# Supplementary material for: MicroRNA expression in apical periodontitis and pulpal inflammation: a systematic review
Source: PeerJ. 2023 Mar 3;11:e14949. doi: 10.7717/peerj.14949 (PMC9987318; doi:10.7717/peerj.14949)
Supplement: Supplemental Information 1 [file peerj-11-14949-s001.xlsx]

## Sheet: IDENTIFICATION 
miRNA profiling in plasma from patients with sleep disorders reveals dysregulation of miRNAs in narcolepsy and other central hypersomnias.	out	irrelevant to our topic
"ARTIFICIOSA ELOQUENTIA" IN THE MIDDLE AGES.	out	irrelevant to our topic
"TRANSLATIO STUDII": A STUDY OF INTELLECTUAL HISTORY IN THE THIRTEENTH-CENTURY.	out	irrelevant to our topic
[Expression of interleukin-17F in human apical periodontitis lesions]. [Chinese]	out	irrelevant to our topic
[Expression of microRNA let-7a, miR-155, and miR-205 in tumor and tumor-adjacent histologically normal tissue in patients with non-small cell lung cancer]. [Russian]	out	irrelevant to our topic
[Histopathology and etiopathogenesis of chronic apical periodontitis--periapical granuloma]. [Review] [Slovak]	out	review
[Lymphocyte subpopulations in inflammatory periapical lesions. A histopathological and immunohistochemical study in 10 cases]. [Italian]	out	irrelevant to our topic
[Prevalence of the various types of periapical lesions and the significance of histologic evaluation]. [Hungarian]	out	irrelevant to our topic
[The expression and significance of receptor activator of nuclear factor kappaB ligand and osteoprotegerin in periapical cyst and periapical granuloma]. [Chinese]	out	irrelevant to our topic
*Animal Models for Periodontal Tissue Engineering: A Knowledge-Generating Process	out	irrelevant to our topic
<i>Fusobacterium nucleatum</i> as a prognostic marker of colorectal cancer in a Japanese population	out	irrelevant to our topic
<i>In vitro</i> biocompatibility and bioactivity of calcium silicate-based bioceramics in endodontics (Review)	out	review
10th Anniversary of the European Association for Predictive, Preventive and Personalised (3P) Medicine - EPMA World Congress Supplement 2020	out	irrelevant to our topic
2016 Program and Abstracts of the Annual Meeting of the Georgia Academy of Science	out	conference abstract
2017 Research Forum Poster Session and Competition: Winners.	out	poster
5-Aza-2’-deoxycytidine enhances lipopolysaccharide-induced inflammatory cytokine expression in human dental pulp cells by regulating TRAF6 methylation	out	irrelevant to our topic
50 Influence of microRNA expression profiles on the efficacy of radiochemotherapy in locally advanced head and neck squamous cell carcinoma.	out	irrelevant to our topic
8 Therapy resistance in HNSCC – Enhanced levels of the cytoprotective protein survivin is mediated by down-regulation of microRNA-542-3p.	out	irrelevant to our topic
8th Santorini Conference Systems Medicine and Personalised Health and Therapy	out	irrelevant to our topic
900 MHz Radiofrequency Radiation Has Potential to Increase the Expression of rno-miR-145-5p in Brain.	out	irrelevant to our topic
A central role for the primary microRNA stem in guiding the position and efficiency of Drosha processing of a viral pri-miRNA.	out	irrelevant to our topic
A clinical, anthropometric and biochemical study to evaluate the nutritional status of geriatric patients before and after prosthodontic rehabilitation	out	irrelevant to our topic
A combinative analysis of gene expression profiles and microRNA expression profiles identifies critical genes and microRNAs in oral lichen planus.	out	irrelevant to our topic
A Community-Based Participatory Research Approach to Understand Urban Latino Parent’s Oral Health Knowledge and Beliefs.	out	irrelevant to our topic
A comparative analysis of angular cephalometric values between CBCT generated lateral cephalographs versus digitized conventional lateral cephalographs	out	irrelevant to our topic
A Comparative Study of the Stress Distribution in Different Endodontic Post-Retained Teeth with and without Ferrule Design--A Finite Element Analysis.	out	irrelevant to our topic
A comparative study on dental pulp response to calcium hydroxide, white and grey mineral trioxide aggregate as pulp capping agents	out	irrelevant to our topic
A Comparison of Pre- and Post-permanent Canine Emergence Secondary Alveolar Bone Grafting on Dental Survival and Maxillary Growth in Patients with Non-syndromic Complete Unilateral Cleft Lip and Palate	out	irrelevant to our topic
A comprehensive study of smoking-specific microRNAalterations in head and neck squamous cell carcinoma.	out	irrelevant to our topic
A Distinctive microRNA (miRNA) Signature in the Blood of Colorectal Cancer (CRC) Patients at Surgery.	out	irrelevant to our topic
A genotoxic stress-responsive miRNA, miR-574-3p, delays cell growth by suppressing the enhancer of rudimentary homolog gene in vitro.	out	irrelevant to our topic
A low dicer expression is associated with resistance to 5- FU-based chemoradiotherapy and a shorter overall survival in patients with oral squamous cell carcinoma.	out	irrelevant to our topic
A microRNA-1 gene, tci-miR-1-3p, is involved in cyflumetofen resistance by targeting a glutathione S-transferase gene, TCGSTM4, in Tetranychus cinnabarinus.	out	irrelevant to our topic
A microRNA, miR-101a, controls mammary gland development by regulating cyclooxygenase-2 expression.	out	irrelevant to our topic
A miRNA-binding-site SNP of MSX1 is Associated with NSOC Susceptibility.	out	irrelevant to our topic
A new tool for predicting type II diabetes.	out	irrelevant to our topic
A newly identified microRNA, mmu-miR-7578, functions as a negative regulator on inflammatory cytokines tumor necrosis factor-alpha and interleukin-6 via targeting Egr1 in vivo.	out	irrelevant to our topic
A Novel Chemically-Modified Curcumin: Pleiotropic Resolvin-like Activity Reduces Inflammation/Collagenolysis during Periodontitis and Diabetes	out	irrelevant to our topic
A novel microRNA, hsa-miR-6852 differentially regulated by Interleukin-27 induces necrosis in cervical cancer cells by downregulating the FoxM1 expression.	out	irrelevant to our topic
A novel miRNA, miR-13664, targets CpCYP314A1 to regulate deltamethrin resistance in Culex pipiens pallens.	out	irrelevant to our topic
A novel mutation of <i>SATB2</i> inhibits odontogenesis of human dental pulp stem cells through Wnt/<i>β</i>-catenin signaling pathway	out	irrelevant to our topic
A novel three-microRNA signature for predicting survival in patients with nasopharyngeal carcinoma.	out	irrelevant to our topic
A panel of microRNAs can be used to determine oral squamous cell carcinoma.	out	irrelevant to our topic
A paradigm shift in cell-free approach: the emerging role of MSCs-derived exosomes in regenerative medicine	out	irrelevant to our topic
A Polysome-Based microRNA Screen Identifies miR-24-3p as a Novel Promigratory miRNA in Mesothelioma.	out	irrelevant to our topic
A preliminary microarray assay of the miRNAexpression signatures in buccal mucosa of oral submucous fibrosis patients.	out	irrelevant to our topic
A Quantitative Analysis of COX-1 vs. COX-2 Enzymes in Inflamed Dental Pulp Following the Administration of Three Different NSAIDs	out	irrelevant to our topic
A Retrospective Brazilian Multicenter Study of Biopsies at the Periapical Area: Identification of Cases of Nonendodontic Periapical Lesions.	out	irrelevant to our topic
A Retrospective Clinical Study to Evaluate Mineral Trioxide Aggregate (MTA) As A Direct Pulp Capping Agent In A One-Visit Protocol	out	irrelevant to our topic
A Review in Research Progress Concerning m6A Methylation and Immunoregulation	out	review
A Review of MicroRNA Associated with Oral Cancer.	out	irrelevant to our topic
A Review on Anti-Inflammatory Activity of Phenylpropanoids Found in Essential Oils	out	review
A role for the miR396/GRF network in specification of organ type during flower development, as supported by ectopic expression of Populus trichocarpa miR396c in transgenic tobacco	out	irrelevant to our topic
A semi-synthetic flavonoid from Bauhinia pulchella stem attenuates inflammatory osteolysis in periodontitisin rats: Impact on cytokine levels, oxidative stress, and RANK/RANKL/OPG pathway.	out	irrelevant to our topic
A U-Net Approach to Apical Lesion Segmentation on Panoramic Radiographs	out	irrelevant to our topic
A unique radioprotective effect of resolvin E1 reduces irradiation-induced damage to the inner ear by inhibiting the inflammatory response	out	irrelevant to our topic
AAV-Anti-miR-214 Prevents Collapse of the Femoral Head in Osteonecrosis by Regulating Osteoblast and Osteoclast Activities	out	irrelevant to our topic
Aberrant expression of interleukin-22 and its targeting microRNAs in oral lichen planus: a preliminary study.	out	irrelevant to our topic
Abstracts	out	conference abstract
Abstracts for MASCC/ISOO Annual Meeting 2019	out	conference abstract
Abstracts for MASCC/ISOO Annual Meeting 2021	out	conference abstract
Abstracts from the XIth World DOHaD Congress	out	conference abstract
Abstracts of Papers	out	conference abstract
Abstracts of the MASCC/ISOO 2016 Annual Meeting	out	conference abstract
Abstracts: 31stEuropean Congress of Pathology	out	conference abstract
Access to deep sedation and general anaesthesia services for dental patients: A survey of Ontario dentists	out	studyy design
Accuracy of digital predictions with CAD/CAM labial and lingual appliances: A retrospective cohort study.	out	irrelevant to our topic
Acute oral treatment with resveratrol and Lactococcus Lactis Subsp. Lactisdecrease body weight and improve liver proinflammatory markers in C57BL/6 mice	out	irrelevant to our topic
Acute stressor exposure modifies plasma exosome-associated heat shock protein 72 (Hsp72) and microRNA (miR-142-5p and miR-203).	out	irrelevant to our topic
Addition of Olive Leaf Extract to a Mixture of Algae and Extra Virgin Olive Oils Decreases Fatty Acid Oxidation and Synergically Attenuates Age-Induced Hypertension, Sarcopenia and Insulin Resistance in Rats	out	irrelevant to our topic
Adipose Tissue as a Strategic Source of Mesenchymal Stem Cells in Bone Regeneration: A Topical Review on the Most Promising Craniomaxillofacial Applications	out	irrelevant to our topic
Adipose-Derived Stem Cell-Derived Extracellular Vesicles Inhibit the Fibrosis of Fibrotic Buccal Mucosal Fibroblasts via the MicroRNA-375/FOXF1 Axis	out	irrelevant to our topic
Adult mesenchymal stem cells and their possibilities for Dentistry: what to expect?	out	irrelevant to our topic
Advances in Cardiotoxicity Induced by Altered Mitochondrial Dynamics and Mitophagy	out	irrelevant to our topic
Advances of tooth‐derived stem cells in neural diseases treatments and nerve tissue regeneration	out	irrelevant to our topic
AGGF1 inhibits the expression of inflammatory mediators and promotes angiogenesis in dental pulp cells	out	irrelevant to our topic
AhR Activation Leads to Massive Mobilization of Myeloid-Derived Suppressor Cells with Immunosuppressive Activity through Regulation of CXCR2 and MicroRNA miR-150-5p and miR-543-3p That Target Anti-Inflammatory Genes.	out	irrelevant to our topic
AK048794 maintains the mouse embryonic stem cell pluripotency by functioning as an miRNA sponge for miR-592.	out	irrelevant to our topic
Allium sativum extract as an irrigant in pulpectomy of primary molars: A 12‐month short‐term evaluation	out	irrelevant to our topic
Alteration of circRNA and lncRNA expression profile in exosomes derived from periodontal ligament stem cells undergoing osteogenic differentiation.	out	irrelevant to our topic
Alteration of MicroRNA Expression of Human Dental Pulp Cells during Odontogenic Differentiation	out	irrelevant to our topic
Alterations in microRNA expression profile in HCV-infected hepatoma cells: involvement of miR-491 in regulation of HCV replication via the PI3 kinase/Akt pathway.	out	irrelevant to our topic
Altered expression of interleukin-17A and its targeting microRNAs in oral lichen planus: a pilot study.	out	study design
Altered expression of microRNA miR-21, miR-155, and let-7a and their roles in pulmonary neuroendocrine tumors.	out	irrelevant to our topic
Altered expression of miR-21, miR-125b, and miR-203 indicates a role for these microRNAs in oral lichen planus.	out	study including other disease
Altered levels of miR-21, miR-125b-2*, miR-138, miR-155, miR-184, and miR-205 in oral squamous cell carcinoma and association with clinicopathological characteristics.	out	irrelevant to our topic
Altered microRNA expression in cisplatin-resistant ovarian cancer cells and upregulation of miR-130a associated with MDR1/P-glycoprotein-mediated drug resistance.	out	irrelevant to our topic
Altered microRNA expression profile in human pituitary GH adenomas: down-regulation of miRNA targeting HMGA1, HMGA2, and E2F1.	out	irrelevant to our topic
Altered microRNA expression profile with miR-27b down-regulation correlated with disease activity of oral lichen planus.	out	irrelevant to our topic
Amelogenin Exon4 Forms a Novel miRNA That Directs Ameloblast and Osteoblast Differentiation.	out	irrelevant to our topic
Amplification and up-regulation of microRNA-30b in oral squamous cell cancers	out	irrelevant to our topic
An activity-regulated microRNA, miR-188, controls dendritic plasticity and synaptic transmission by downregulating neuropilin-2.	out	irrelevant to our topic
An allelic series of miR-17 ~ 92-mutant mice uncovers functional specialization and cooperation among members of a microRNA polycistron.	out	irrelevant to our topic
An Assessment of Direct Restorative Material Use in Posterior Teeth by Pediatric Dentists in Canada and the United States of America	out	irrelevant to our topic
An Evaluation of Root Length Change Measurements using Intraoral Scan and Panoramic Radiographs	out	irrelevant to our topic
An Evidence Based Review of Literature-Effect of Orthodontic Treatment on Endodontically Treated Teeth	out	review
An Evidence-Based Systematic Review of Human Knee Post-Traumatic Osteoarthritis (PTOA): Timeline of Clinical Presentation and Disease Markers, Comparison of Knee Joint PTOA Models and Early Disease Implications	out	systematic review
An in vitro study of comparison of different bleaching agents in temporary and permanent teeth	out	irrelevant to our topic
An In Vivo Method to Identify microRNA Targets Not Predicted by Computation Algorithms: p21 Targeting by miR-92a in Cancer.	out	irrelevant to our topic
An Optimized Sponge for microRNA miR-9 Affects Spinal Motor Neuron Development in vivo.	out	irrelevant to our topic
An RNA-seq screen of P. gingivalis LPS treated human gingival fibroblasts.	out	irrelevant to our topic
An Update on Nickel-Titanium Rotary Instruments in Endodontics: Mechanical Characteristics, Testing and Future Perspective—An Overview	out	irrelevant to our topic
Analysis of DNA methylation of E‐cadherin and p16ink4a in oral lichen planus/oral lichenoid lesions	out	irrelevant to our topic
Analysis of expression patterns of IGF-1, caspase-3 and HSP-70 in developing human tooth germs.	out	irrelevant to our topic
Analysis of Fusobacterium persistence and antibiotic response in colorectal cancer	out	irrelevant to our topic
Analysis of Interleukin-8 Gene Variants Reveals Their Relative Importance as Genetic Susceptibility Factors for Chronic Periodontitis in the Han Population	out	irrelevant to our topic
Analysis of lncRNAs‐miRNAs‐mRNAs networks in periodontal ligament stem cells under mechanical force.	out	irrelevant to our topic
Analysis of miRNA expression profiling in human macrophages responding to Mycobacterium infection: induction of the immune regulator miR-146a.	out	irrelevant to our topic
Analysis of periodontitis-associated miRNAs in gingival tissue, gingival crevicular fluid, saliva and blood plasma.	out	irrelevant to our topic
Analysis of the characteristics and expression profiles of coding and noncoding RNAs of human dental pulp stem cells in hypoxic conditions	out	irrelevant to our topic
Anesthetic efficacy of articaine hydrochloride versus lidocaine hydrochloride: A meta-analysis	out	metanalysis
Anesthetic Efficacy of Lidocaine/Ketorolac in Inferior Alveolar Nerve Block in Patients with Irreversible Pulpitis: A Randomized Clinical Trial	out	irrelevant to our topic
Angelicin Alleviates Post-Trauma Osteoarthritis Progression by Regulating Macrophage Polarization via STAT3 Signaling Pathway	out	irrelevant to our topic
Angiogenesis in Regenerative Dentistry: Are We Far Enough for Therapy?	out	irrelevant to our topic
Angiotensin converting enzyme: A review on expression profile and its association with human disorders with special focus on SARS-CoV-2 infection	out	irrelevant to our topic
Anorganic Bovine Bone (Bio-Oss) Regulates miRNA of Osteoblast-like Cells.	out	irrelevant to our topic
Anorganic bovine bone and a silicate-based synthetic bone activate different microRNAs.	out	irrelevant to our topic
Anti-inflammatory and antiresorptive effects of Calendula officinalis on inflammatory bone loss in rats.	out	animal study
Anti-inflammatory roles of microRNA 21 in lipopolysaccharide-stimulated human dental pulp cells	in in full text
Antibacterial effects of N-acetylcysteine against endodontic pathogens	out	irrelevant to our topic
Antifibrotic Potential of MiR-335-3p in Hereditary Gingival Fibromatosis.	out	irrelevant to our topic
Antimicrobial Effect of a Peptide Containing Novel Oral Spray on Streptococcus mutans	out	irrelevant to our topic
Apical periodontitis: preliminary assessment of microbiota by 16S rRNA high throughput amplicon target sequencing.	out	irrelevant to our topic
Apikale Dichtigkeit Zweier Wurzelkanalsealer - Ah Plus Und GuttaFlow - Unter Verwendung Vier Verschiedener Obturationstechniken	out	article not written in english language
Apikale Dichtigkeit Zweier Wurzelkanalsealer - Epiphany SE Und Tubli Seal EWT - Unter Verwendung Vier Verschiedener Obturationstechniken	out	article not written in english language
Apoptotic and anti-apoptotic factors in early human mandible development.	out	irrelevant to our topic
Application of Active Charcoal as An Ingredient of A Natural Bleaching Teeth.	out	irrelevant to our topic
Application of Stem Cells in Oral Disease Therapy: Progresses and Perspectives	out	irrelevant to our topic
Applying the molecular biology and epigenetics of head and neck cancer in everyday clinical practice	out	irrelevant to our topic
Articulatio Temporomandibularis Disfonksiyonu Olan Bireylerde Eklem ve ÇIğneme Kaslarinin Morfometrik Analizi ve Kuru Iğneleme Yönteminin Etkileri	out	article not written in english language
Aryl amide small-molecule inhibitors of microRNA miR-21 function.	out	irrelevant to our topic
Ascorbic Acid, Inflammatory Cytokines (IL-1β/TNF-α/IFN-γ), or Their Combination's Effect on Stemness, Proliferation, and Differentiation of Gingival Mesenchymal Stem/Progenitor Cells	out	irrelevant to our topic
Ascorbic Acid: A New Player of Epigenetic Regulation in LPS-gingivalis Treated Human Periodontal Ligament Stem Cells	out	irrelevant to our topic
Ascorbic Acid/Retinol and/or Inflammatory Stimuli’s Effect on Proliferation/Differentiation Properties and Transcriptomics of Gingival Stem/Progenitor Cells	out	irrelevant to our topic
Aspects of Management in the Restoration of Molar Teeth	out	irrelevant to our topic
Assessing Anti-miR Pharmacology with miRNA Polysome Shift Assay.	out	irrelevant to our topic
Assessing miRNAs profile expression as a risk stratification biomarker in oral potentially malignant disorders: A systematic review.	out	systematic review
Assessing the Outcomes of Cracked Teeth	out	irrelevant to our topic
Assessment of cervical lymph node metastasis based on total RNA from saliva and tumor tissue in patients with oral squamous cell carcinoma: An observational study.	out	irrelevant to our topic
Assessment of microRNA‐144‐5p and its putative targets in inflamed gingiva from chronic periodontitispatients.	out	irrelevant to our topic
Assessment of microRNA‐146a in generalized aggressive periodontitis and its association with disease severity.	out	irrelevant to our topic
Association analysis of miRNA-related genetic polymorphisms in miR-143/145 and KRAS with colorectal cancer susceptibility and survival.	out	irrelevant to our topic
Association between concentration of active MMP-9 in pulpal blood and pulpotomy outcome in permanent mature teeth with irreversible pulpitis - a preliminary study.	out	irrelevant to our topic
Association between Estrogen, Vitamin D and Microrna17 Gene Polymorphisms and Periapical Lesions	in in full text
Association between genetic polymorphisms in DEFB1 and microRNA202 with caries in two groups of Brazilian children.	out	irrelevant to our topic
Association between High miR-211 microRNA Expression and the Poor Prognosis of Oral Carcinoma.	out	irrelevant to our topic
Association between Pulpal-Periapical Pathology and Autoimmune Diseases: A Systematic Review	out	systematic review
Association between the rs2910164 polymorphism in pre-mir-146a and oral carcinoma progression	out	irrelevant to our topic
Association of DNA sequence-independent genetic regulatory mechanisms with apical periodontitis: A scoping review	out	review
Association of long non‐coding RNA MEG3 polymorphisms with oral squamous cell carcinoma risk.	out	irrelevant to our topic
Association of microRNA 17 host gene variant (rs4284505) with susceptibility and severity of systemic lupus erythematosus	out	irrelevant to our topic
Association of the mir-499 polymorphisms with oral cavity and oropharyngeal squamous cell carcinoma in an Iranian population.	out	irrelevant to our topic
Association of WNT Pathway Genes With Nonsyndromic Cleft Lip With or Without Cleft Palate.	out	irrelevant to our topic
Associations between microRNA (miR-25, miR-32, miR-125, and miR-222) polymorphisms and recurrent implantation failure in Korean women.	out	irrelevant to our topic
Associations of the microRNA gene polymorphisms with the risk of non-syndromic supernumerary teeth in a Chinese population.	out	irrelevant to our topic
Astragaloside IV protects against iron loading‐induced abnormal differentiation of bone marrow mesenchymal stem cells (BMSCs)	out	irrelevant to our topic
Astrocyte-Derived Exosomal microRNA miR-200a-3p Prevents MPP+-Induced Apoptotic Cell Death Through Down-Regulation of MKK4.	out	irrelevant to our topic
Australian &amp; New Zealand Division 38th Annual Scientific Meeting September 27 - 29, 1998 Brisbane, Australia	out	conference abstract
Autophagy regulates odontoblast differentiation by suppressing NF-κB activation in an inflammatory environment	out	irrelevant to our topic
Bactericidal effect of a diode laser on <i>Enterococcus faecalis</i> in human primary teeth—an in vitro study	out	irrelevant to our topic
Basic Research.	out	irrelevant to our topic
Bead-based microarray analysis of microRNA expression in hepatocellular carcinoma: miR-338 is downregulated.	out	irrelevant to our topic
Benign Neoplasia of Tooth and Bone: (Section of Odontology)	out	irrelevant to our topic
Berberine reduces inflammation of human dental pulp fibroblast via miR-21/KBTBD7 axis	out	irrelevant to our topic
Binding of microRNA-135a (miR-135a) to homeobox protein A10 (HOXA10) mRNA in a high-progesterone environment modulates the embryonic implantation factors beta3-integrin (ITGbeta3) and empty spiracles homeobox-2 (EMX2).	out	irrelevant to our topic
Biofilms and apical periodontitis: study of prevalence and association with clinical and histopathologic findings.	out	irrelevant to our topic
Biogenesis of MicroRNAs and its Implication in Head and Neck Pathologies: A Narrative Review.	out	review
Bioinformatics analysis of dysregulated exosomal microRNAs derived from oral squamous cell carcinoma cells.	out	irrelevant to our topic
Bioinformatics Analysis of Gene Expression Profiles for Risk Prediction in Patients with Septic Shock	out	irrelevant to our topic
Bioinformatics Analysis Reveals Genes Involved in the Pathogenesis of Ameloblastoma and Keratocystic Odontogenic Tumor	out	irrelevant to our topic
Biological Activities and Potential Oral Applications of N-Acetylcysteine: Progress and Prospects	out	irrelevant to our topic
Biological links in periodontitis and rheumatoid arthritis: Discovery via text‐mining PubMed abstracts.	out	irrelevant to our topic
Biological Markers for Pulpal Inflammation: A Systematic Review	out	systematic review
Biomaterials Enabled Cell-Free Strategies for Endogenous Bone Regeneration	out	irrelevant to our topic
Blood and Salivary MicroRNAs for Diagnosis of Oral Squamous Cell Carcinoma: A Systematic Review and Meta-Analysis.	out	systematic review and meta-analysis
Blood-based circulating microRNAs as potential biomarkers for predicting the prognosis of head and neck cancer—a systematic review.	out	systematic review
Bone microRNA-21 as surgical stress parameter is associated with third molar postoperative discomfort.	out	irrelevant to our topic
Boswellic acid exerts antitumor effects in colorectal cancer cells by modulating expression of the let-7 and miR-200 microRNA family.	out	irrelevant to our topic
Burning Mouth Syndrome Secondary to Antihypertensive Drug Use: Clinical Case Report.	out	clinical case report
Cad-Cam Cerec 3 Sistemiyle Hazırlanan Inleylerin Marjinal Adaptasyonlarının <i>In Vitro</i> Olarak Değerlendirilmesi	out	article not written in english language
Calcitonin, sodium alendronate and high intensity laser in the treatment of traumatized teeth: a preliminary study	out	irrelevant to our topic
Calculus-like deposit at apex of tooth with refractory apical periodontitis.	out	irrelevant to our topic
Calvarial bone development and suture closure in Dicer-deficient mice.	out	irrelevant to our topic
Can oral infection be a risk factor for Alzheimer's disease?	out	irrelevant to our topic
Cancer-associated fibroblast regulation by microRNAs promotes invasion of oral squamous cell carcinoma.	out	irrelevant to our topic
Cannabinoid Receptor 2 (CB2) Ligands Downregulate Pro-Inflammatory Markers in Stimulated Primary Human Periodontal Ligament Fibroblasts (hPDLFs)	out	irrelevant to our topic
Cap-Ca (Oh)<sub>2</sub> Kombinasyonunun Normal Ve Iltihaplı Pulpa Dokusu üzerine Etkisinin Köpek Dişlerinde Incelenmesi	out	article not written in english language
Carbohydrate Metabolism Regulated by Antisense RNA in Cariogenicity.	out	irrelevant to our topic
Caries and Innate Immunity: DEFB1 Gene Polymorphisms and Caries Susceptibility in Genetic Isolates from North-Eastern Italy.	out	irrelevant to our topic
Caries increment in the permanent dentition of Mexican children in relation to prior caries experience on permanent and primary dentitions	out	irrelevant to our topic
CCR5Δ32 in Brazil: Impacts of a European Genetic Variant on a Highly Admixed Population	out	irrelevant to our topic
CD146 在 MSCs 中的作用	out	article not written in english language
Cell proliferation and apoptosis in the fusion of human primary and secondary palates.	out	irrelevant to our topic
Cellular Profile and Expression of Immunologic Markers in Chronic Apical Periodontitisfrom HIV-infected Patients Undergoing Highly Active Antiretroviral Therapy.	out	irrelevant to our topic
Central Nervous System Cell-Derived Exosomes in Neurodegenerative Diseases	out	irrelevant to our topic
CGFe and TGF-β1 enhance viability and osteogenic differentiation of human dental pulp stem cells through the MAPK pathway	out	irrelevant to our topic
Challenges and strategy in treatment with exosomes for cell-free-based tissue engineering in dentistry	out	irrelevant to our topic
Changes in miRNA expression in sera and correlation to duration of disease in patients with multifocal mucosal lichen planus.	out	irrelevant to our topic
Characteristics, Classification, and Application of Stem Cells Derived from Human Teeth	out	irrelevant to our topic
Characterization of foreign body materials in oral and maxillofacial biopsies using FT-IR spectroscopy	out	irrelevant to our topic
Characterization of the Protective Role of Regulatory T Cells in Experimental Periapical Lesions Development and Its Chemoattraction Manipulation as a Therapeutic Tool	out	irrelevant to our topic
Chemistry - Histochemistry; Reports Summarize Histochemistry Findings from Medical University of Warsaw [Metalloproteinase 14 (MMP-14) and hsa-miR-410-3p expression in human inflamed dental pulp and odontoblasts]	out	irrelevant to our topic
Chemokine Function in Periodontal Disease and Oral Cavity Cancer	out	irrelevant to our topic
Chemomechanical Removal of Caries in Primary Teeth	out	irrelevant to our topic
Chronic Orofacial Pain: Models, Mechanisms, and Genetic and Related Environmental Influences	out	irrelevant to our topic
Cigarette smoke condensate promotes pro-tumourigenic stromal-epithelial interactions by suppressing miR-145.	out	irrelevant to our topic
Circ_0081572 inhibits the progression of periodontitis through regulating the miR-378h/RORA axis.	out	irrelevant to our topic
Circadian rhythms and gene expression during mouse molar tooth development.	out	irrelevant to our topic
circBICD2 targets miR‐149‐5p/IGF2BP1 axis to regulate oral squamous cell carcinoma progression.	out	irrelevant to our topic
CircRNA Lrp6 promotes cementoblast differentiation via miR‐145a‐5p/Zeb2 axis.	out	irrelevant to our topic
Circular RNA Hsa_circ_0006766 targets microRNA miR-4739 to regulate osteogenic differentiation of human bone marrow mesenchymal stem cells.	out	irrelevant to our topic
Circulating let-7e-5p, miR-106a-5p, miR-28-3p, and miR-542-5p as a Promising microRNA Signature for the Detection of Colorectal Cancer.	out	irrelevant to our topic
Circulating miRNAs from blood, plasma or serum as promising clinical biomarkers in oral squamous cell carcinoma: A systematic review of current findings.	out	systematic review
Circulating muscle-specific microRNA, miR-206, as a potential diagnostic marker for rhabdomyosarcoma.	out	irrelevant to our topic
Clinical Assessment of Microbial Count in Laser-Assisted Endodontic Therapy of Dual Wavelengths in Ga as Diode Laser (Randomized Clinical Trial)	out	irrelevant to our topic
Clinical Evaluation of Low Level Diode Laser Application For Primary Teeth Pulpotomy	out	irrelevant to our topic
Clinical Evaluation of the Efficacy of Neodymium-Doped Yttrium Aluminium Garnet (Nd: YAG) Laser Therapy and Sensikin? in Treatment of Dentine Hypersensitivity	out	irrelevant to our topic
Clinical implications of epigenetic regulation in oral cancer.	out	irrelevant to our topic
Clinical significance of head and neck squamous cell cancer biomarkers.	out	irrelevant to our topic
Clinical Value and Potential Target of miR-27a-3p in Pulpitis	in in full text
Clinicopathological significance of miR‐26, miR‐107, miR‐125b, and miR‐203 in head and neck carcinomas.	out	irrelevant to our topic
Cognitive Impairment and Dementia: Gaining Insight through Circadian Clock Gene Pathways	out	irrelevant to our topic
Colon Cancer-Associated Fusobacterium nucleatum May Originate From the Oral Cavity and Reach Colon Tumors via the Circulatory System	out	irrelevant to our topic
Combined Sodium Hypochlorite and 940 nm Diode Laser Treatment Against Mature E. Faecalis Biofilms in-vitro	out	irrelevant to our topic
Common genetic variants in miR-1206 (8q24.2) and miR-612 (11q13.3) affect biogenesis of mature miRNA forms.	out	irrelevant to our topic
Comparative analysis of blood and saliva expression profiles in chronic and refractory periodontitis patients	out	irrelevant to our topic
Comparative Characteristics of the Methods of Treatment of Chronic Periodontitis Using Antibacterial Photodynamic Therapy (Per One Visit) and Calasept Preparation	out	irrelevant to our topic
Comparative Evaluation of the Effects of CO2 and Er:YAG Lasers on Smear Layer Removal and Blood Cell Attachment to Tooth Root Surfaces	out	irrelevant to our topic
Comparative evaluation of the vertical fracture resistance of endodontically treated roots filled with Gutta-percha and Resilon: a meta-analysis of in vitro studies	out	irrelevant to our topic
Comparative Secretome Analysis of Mesenchymal Stem Cells From Dental Apical Papilla and Bone Marrow During Early Odonto/Osteogenic Differentiation: Potential Role of Transforming Growth Factor-β2	out	irrelevant to our topic
Comparing two approaches of miR-34a target identification, biotinylated-miRNA pulldown vs miRNA overexpression.	out	irrelevant to our topic
Comparision of diagnostic accuracy of intraosseous jaw lesions via CBCT & 3DCT: An original research	out	irrelevant to our topic
Comparison of anaesthetic efficacy of 4% articaine buccal infiltration versus 2% lidocaine inferior alveolar nerve block for pulpotomy in mandibular primary second molars.	out	irrelevant to our topic
Comparison of Er,Cr:YSGG and diode laser effects on dentin hypersensitivity: a split-mouth randomized clinical trial	out	irrelevant to our topic
Comparison of immunomodulatory properties of exosomes derived from bone marrow mesenchymal stem cells and dental pulp stem cells	out	irrelevant to our topic
Comparison of Ion Release Chromium Soaked in Artificial Saliva and Extract the Starfruit Wuluh (Averrhoa Bilimbi L.).	out	irrelevant to our topic
Comparison of miRNA expression profiles in individuals with chronic or aggressive periodontitis.	out	irrelevant to our topic
Comparison of Pretreatment by Different Analgesics on Post-operative Endodontic Pain: A Clinical Study	out	irrelevant to our topic
Comparison of proliferation, apoptosis and expression of syndecan-1 and α-SMA in edentulous ridge oral mucosa of successful and early failed submerged dental implants—An immunohistochemical study.	out	irrelevant to our topic
Comparison of Radiovisiography with Conventional Bitewing Radiography in Assissing Proximal Caries.	out	irrelevant to our topic
Comparison of ultrasound imaging and cone-beam computed tomography for examination of the alveolar bone level: A systematic review	out	systematic review
Complex integrated analysis of lncRNAs-miRNAs-mRNAs in oral squamous cell carcinoma.	out	irrelevant to our topic
Comprehensive analysis of an lncRNA-miRNA-mRNA competing endogenous RNA network in pulpitis	in in full text
Comprehensive analysis of circRNA expression pattern and circRNA-miRNA-mRNA network in oral squamous cell carcinoma.	out	irrelevant to our topic
Comprehensive Analysis of Differentially Expressed Genes in Clinically Diagnosed Irreversible Pulpitis by Multiplatform Data Integration Using a Robust Rank Aggregation Approach	in in full text
Comprehensive identification of microRNA arm selection preference in lung cancer: miR-324-5p and -3p serve oncogenic functions in lung cancer.	out	irrelevant to our topic
Comprehensive management of a lateral incisor with a deep palatoradicular groove: A case report.	out	case report
Computational gene expression profiling in the exploration of biomarkers, non-coding functional RNAs and drug perturbagens for COVID-19	out	irrelevant to our topic
Concordant dysregulation of miR-5p and miR-3p arms of the same precursor microRNA may be a mechanism in inducing cell proliferation and tumorigenesis: a lung cancer study.	out	irrelevant to our topic
Conditional Knockout of the MicroRNA 17-92 Cluster in Type-I Collagen-Expressing Cells Decreases Alveolar Bone Size and Incisor Tooth Mechanical Properties	out	irrelevant to our topic
Conditioned medium derived from 3D tooth germs: A novel cocktail for stem cell priming and early in vivo pulp regeneration	out	irrelevant to our topic
Cone beam computed tomography (CBCT) in periodontal diseases: a Systematic review based on the efficacy model	out	irrelevant to our topic
Confirmation of symmetrical distributions of clinical attachment loss and tooth loss in a homogeneous Mexican adult male population.	out	irrelevant to our topic
Connexin 43 contributes to ectopic orofacial pain following inferior alveolar nerve injury	out	irrelevant to our topic
Conserved regulation of p53 network dosage by microRNA-125b occurs through evolving miRNA-target gene pairs.	out	irrelevant to our topic
Contents Vol. 28, 2019	out	irrelevant to our topic
Continental European Division Scandinavian Association for Dental Research Joint Meeting September 12-15, 1996 Berlin, Germany	out	irrelevant to our topic
Control of Cytokine mRNA Expression by RNA-binding Proteins and microRNAs.	out	irrelevant to our topic
Correlation between tissue expression of microRNA-137 and CD8 in oral lichen planus.	out	irrelevant to our topic
Corrigendum to "MicroRNA-17/20a functions to inhibit cell migration and can be used a prognostic marker in oral squamous cell carcinoma" [Oral Oncol. 49(9) (2013) 923-931].	out	irrelevant to our topic
Crosstalk between miR-34a and Notch Signaling Promotes Differentiation in Apical Papilla Stem Cells (SCAPs).	out	irrelevant to our topic
Current trends in miRNAs and their relationship with oral squamous cell carcinoma.	out	irrelevant to our topic
Current Understanding of Osteoimmunology in Certain Osteoimmune Diseases	out	irrelevant to our topic
CXXC5 Mediates P. gingivalis-suppressed Cementoblast Functions Partially via MAPK Signaling Network	out	irrelevant to our topic
Cyclic tensile strain promotes the ECM synthesis of cranial base synchondrosis chondrocytes by upregulating miR-140-5p.	out	irrelevant to our topic
Data integration of 104 studies related with microRNA epigenetics revealed that miR-34 gene family is silenced by DNA methylation in the highest number of cancer types.	out	irrelevant to our topic
Decrease of miR-146a is associated with the aggressiveness of human oral squamous cell carcinoma.	out	irrelevant to our topic
Decreased expression of hepatocyte nuclear factor 4alpha (Hnf4alpha)/microRNA-122 (miR-122) axis in hepatitis B virus-associated hepatocellular carcinoma enhances potential oncogenic GALNT10 protein activity.	out	irrelevant to our topic
Decreased expression of hsa_circ_0072387 as a valuable predictor for oral squamous cell carcinoma.	out	irrelevant to our topic
Decreased expression of microRNA-30b promotes the development of pulpitis by upregulating the expression of interleukin-6 receptor	in in full text
Decreased MicroRNA miR-181c Expression Associated with Gastric Cancer.	out	irrelevant to our topic
Decreased osteogenesis of adult mesenchymal stem cells by reactive oxygen species under cyclic stretch: a possible mechanism of age related osteoporosis	out	irrelevant to our topic
Deep learning for categorization of endodontic lesion based on radiographic periapical index scoring system	out	irrelevant to our topic
Deep MicroRNA sequencing reveals downregulation of miR-29a in neuroblastoma central nervous system metastasis.	out	irrelevant to our topic
Deep sequencing of short RNAs reveals novel microRNAs in minor salivary glands of patients with Sjögren's syndrome.	out	irrelevant to our topic
Deep sequencing-based microRNA expression signatures in head and neck squamous cell carcinoma: dual strands of pre-miR-150 as antitumor miRNAs.	out	irrelevant to our topic
Deep Ultraviolet Light-Emitting Diode Light Therapy for Fusobacterium nucleatum	out	irrelevant to our topic
Degradation of MicroRNA miR-466d-3p by Japanese Encephalitis Virus NS3 Facilitates Viral Replication and Interleukin-1beta Expression.	out	irrelevant to our topic
Dendritic cells of the oral mucosa	out	irrelevant to our topic
Dental Diseases and Conditions - Pulpitis; Findings from Jilin University Broaden Understanding of Pulpitis [Mica A let-7c-5p Suppressed Lipopolysaccharide-Induced Dental Pulp Inflammation by Inhibiting Dentin Matrix Protein-1-Mediated Nuclear Factor kappa B (NF-kappa B) Pathway In Vitro ...]	out	irrelevant to our topic
Dental Diseases and Conditions - Pulpitis; Findings from Jilin University in the Area of Pulpitis Reported (Microrna Let-7c-5p Promotes Osteogenic Differentiation of Dental Pulp Stem Cells By Inhibiting Lipopolysaccharide-induced Inflammation Via Hmga2/pi3k/akt Signal Blockade)	out	irrelevant to our topic
Dental Diseases and Conditions - Pulpitis; Reports on Pulpitis from Qingdao Stomatological Hospital Provide New Insights (Berberine reduces inflammation of human dental pulp fibroblast via miR-21/KBTBD7 axis)	out	irrelevant to our topic
Dental erosion in Cuban children associated with excessive consumption of oranges.	out	irrelevant to our topic
Dental fluorosis in cohorts born before, during, and after the national salt fluoridation program in a community in Mexico.	out	irrelevant to our topic
Dental Follicle Cells Participate in Tooth Eruption via the RUNX2- MiR-31-SATB2 Loop.	out	irrelevant to our topic
Dental follicle stem cells rescue the regenerative capacity of inflamed rat dental pulp through a paracrine pathway	out	irrelevant to our topic
Dental pulp cell-derived powerful inducer of TNF-α comprises PKR containing stress granule rich microvesicles	out	irrelevant to our topic
Dental Pulp Defence and Repair Mechanisms in Dental Caries	out	irrelevant to our topic
Dental Pulp Stem Cell-Derived Secretome and Its Regenerative Potential	out	irrelevant to our topic
Dental stem cell-derived extracellular vesicles as promising therapeutic agents in the treatment of diseases	out	irrelevant to our topic
Dental Stem Cell-Derived Secretome/Conditioned Medium: The Future for Regenerative Therapeutic Applications	out	irrelevant to our topic
Dental-Derived Mesenchymal Stem Cells: State of the Art	out	irrelevant to our topic
Dentin and dental pulp regeneration by the patient’s endogenous cells	out	irrelevant to our topic
Dentist's preferences on vital and nonvital tooth bleaching: findings from a Guatemalan survey.	out	irrelevant to our topic
Dentomaxillofacial imaging with panoramic views and cone beam CT	out	irrelevant to our topic
Descriptive analysis of dental X-ray images using various practical methods: A review	out	review
Design of a miRNA sponge for the miR-17 miRNA family as a therapeutic strategy against vulvar carcinoma.	out	irrelevant to our topic
Desmosomes: A light microscopic and ultrastructural analysis of desmosomes in odontogenic cysts	out	irrelevant to our topic
Detectability of Osseous Lesions with a Pre-Programmed Low-Dose Protocol for Cone-Beam Computed Tomography	out	irrelevant to our topic
Detection and measurements of apical lesions in the upper jaw by cone beam computed tomography and panoramic radiography as a function of cortical bone thickness	out	irrelevant to our topic
Detection of Dental Apical Lesions Using CNNs on Periapical Radiograph	out	irrelevant to our topic
Detection of Epstein–Barr Virus in Periodontitis: A Review of Methodological Approaches	out	irrelevant to our topic
Detection of Exosomal PD-L1 RNA in Saliva of Patients With Periodontitis	out	irrelevant to our topic
Development of a Deep Learning Algorithm for Periapical Disease Detection in Dental Radiographs	out	irrelevant to our topic
Development of a microfluidic immunoassay platform for the rapid quantification of low-picomolar concentrations of protein biomarkers	out	irrelevant to our topic
Development of an immune‐related lncRNA–miRNA–mRNA network based on competing endogenous RNA in periodontitis.	out	irrelevant to our topic
Development of secondary palate requires strict regulation of ECM remodeling: sequential distribution of RECK, MMP-2, MMP-3, and MMP-9	out	irrelevant to our topic
Diagnostic Accuracy of Cone-beam Computed Tomography and Conventional Radiography on Apical Periodontitis: A Systematic Review and Meta-analysis.	out	irrelevant to our topic
Diagnostic and prognostic value of miRNAs on salivary gland tumors: a systematic review and meta-analysis.	out	systematic review and meta-analysis
Diagnostic biomarker candidates for pulpitis revealed by bioinformatics analysis of merged microarray gene expression datasets	out	irrelevant to our topic
Diagnostic implications of miRNAs in Liquid Biopsy for Oral Squamous Cell Carcinoma (OSCC): Clinical validity and interpretation.	out	irrelevant to our topic
Diagnostic potential of peri-implant crevicular fluid microRNA-21-3p and microRNA-150-5p and extracellular vesicles in peri-implant diseases.	out	irrelevant to our topic
Diagnostic profiling of salivary exosomal micro RNAs in oral lichen planus patients.	out	irrelevant to our topic
DIAGNOSTIC VALUE OF MICRO RNA BIOMARKERS AS AN EARLY DIAGNOSTIC METHOD OF ORAL SQUAMOUS CELL CARCINOMA.	out	irrelevant to our topic
Dichtigkeitsanalyse Der Koronalen Verbundzone adhäsiv Inserierter Glasfaserstifte – Eine Langzeitstudie	out	article not written in english language
Dichtigkeitsuntersuchung Von adhäsiv Eingesetzten Glasfaserstiften	out	article not written in english language
Different expression patterns of Lin28 and Lin28b in mouse molar development.	out	animal study
Differential diagnosis of apical periodontitis and nasopalatine duct cyst.	out	irrelevant to our topic
Differential expression levels of plasma-derived miR-146b and miR-155 in papillary thyroid cancer.	out	irrelevant to our topic
Differential expression of matrix metalloproteinases and miRNAs in the metastasis of oral squamous cell carcinoma.	out	irrelevant to our topic
Differential Expression of MicroRNAs in Normal and Inflamed Human Pulps	in in full text
Differential expression of miR-1, a putative tumor suppressing microRNA, in cancer resistant and cancer susceptible mice.	out	irrelevant to our topic
Differential expression profiles of microRNAs/mRNA and docking study in oral squamous cell carcinoma.	out	irrelevant to our topic
Differential microRNA expression in cultured palatal fibroblasts from infants with cleft palate and controls.	out	irrelevant to our topic
Differential MicroRNA Expression of miR-21 and miR-155 within Oral Cancer Extracellular Vesicles in Response to Melatonin.	out	irrelevant to our topic
Difficulties detecting miRNA-203 in human whole saliva by the use of PCR.	out	irrelevant to our topic
Direct Dental Pulp Tissue Grafting – a Novel Approach to Regenerative Endodontics	out	irrelevant to our topic
Discovering the Health Promoting Potential of Fermented Papaya Preparation—Its Future Perspectives for the Dietary Management of Oxidative Stress During Diabetes	out	irrelevant to our topic
Diseases of the oral cavity in light of the newest epigenetic research: Possible implications for stomatology	out	irrelevant to our topic
Disodium Chlodronate Prevents Bone Resorption in Experimental Periodontitis in Rats.	out	animal study
Disostosis cleidocraneal a tres años de tratamiento ortopédico.	out	article not written in english language
Distinct Expression of miR-378 in Nonsyndromic Cleft Lip and/or Cleft Palate: A Cogitation of Skewed Sex Ratio in Prevalence.	out	irrelevant to our topic
Distinct microRNA expression profiles in saliva and salivary gland tissue differentiate patients with primary Sjögren's syndrome from non‐Sjögren's sicca patients.	out	irrelevant to our topic
Disturbed Expression of EphB4, but Not EphrinB2, Inhibited Bone Regeneration in an In Vivo Inflammatory Microenvironment	out	irrelevant to our topic
Divergent Effects of miR-181 Family Members on Myocardial Function Through Protective Cytosolic and Detrimental Mitochondrial microRNA Targets.	out	irrelevant to our topic
DNA methylcytosine dioxygenase ten-eleven translocation 2 enhances lipopolysaccharide-induced cytokine expression in human dental pulp cells by regulating MyD88 hydroxymethylation	out	irrelevant to our topic
DNA Oncogenic Virus-Induced Oxidative Stress, Genomic Damage, and Aberrant Epigenetic Alterations	out	irrelevant to our topic
Down regulation of RhoC by microRNA-138 results in de-activation of FAK, Src and Erk1/2 signaling pathway in head and neck squamous cell carcinoma.	out	irrelevant to our topic
Down-regulated expression of family with sequence similarity 3, member B (FAM3B), in oral squamous cell carcinoma	out	irrelevant to our topic
Down-regulation of miR-302b, an ESC-specific microRNA, in Gastric Adenocarcinoma.	out	irrelevant to our topic
Down-regulation of the microRNA-99 family members in head and neck squamous cell carcinoma	out	irrelevant to our topic
Downregulated miR-27b promotes keratinocyte proliferation by targeting PLK2 in oral lichen planus.	out	irrelevant to our topic
Downregulation of matrix metalloproteinase 14 by the antitumor miRNA, miR-150-5p, inhibits the aggressiveness of lung squamous cell carcinoma cells.	out	irrelevant to our topic
Downregulation of microRNA-204 increases the expression of matrix metallopeptidase 9 in pediatric patients with pulpitis and <i>Helicobacter pylori</i> infection in the stomach	out	irrelevant to our topic
Downregulation of MicroRNA-551b Correlates With Dissemination of Human Oral Squamous Cell Carcinoma.	out	irrelevant to our topic
Downregulation of miR-224-5p Promotes Migration and Proliferation in Human Dental Pulp Stem Cells	out	irrelevant to our topic
Dual Regulation of miR-34a and Notch Signaling in Triple-Negative Breast Cancer by Antibody/miRNA Nanocarriers.	out	irrelevant to our topic
Dual-strand tumor-suppressor microRNA-145 (miR-145-5p and miR-145-3p) coordinately targeted MTDH in lung squamous cell carcinoma.	out	irrelevant to our topic
Dynamic evolution of mir-17-92 gene cluster and related miRNA gene families in vertebrates.	out	irrelevant to our topic
Dysregulation of AKT1, a miR-138 target gene, is involved in the migration and invasion of tongue squamous cell carcinoma.	out	irrelevant to our topic
Dysregulation of genes and microRNAs in localized aggressive periodontitis.	out	irrelevant to our topic
Dysregulation of human miRNAs and increased prevalence of HHV miRNAs in obese periodontitis subjects.	out	irrelevant to our topic
Dysregulation of mi R-31 and mi R-375 expression is associated with clinical outcomes in oral carcinoma.	out	irrelevant to our topic
Dysregulation of miR-146a by periodontal pathogens: A risk for acute coronary syndrome.	out	irrelevant to our topic
Dysregulation of miR-21-associated miRNA regulatory networks by chronic ethanol consumption impairs liver regeneration.	out	irrelevant to our topic
EANM'17	out	irrelevant to our topic
Effect of a Combination of Photodynamic Therapy and Chitosan on Streptococcus mutans (An In Vitro Study)	out	irrelevant to our topic
Effect of Ascorbic Acid on Differentiation, Secretome and Stemness of Stem Cells from Human Exfoliated Deciduous Tooth (SHEDs)	out	irrelevant to our topic
Effect of Drug-Coated Nanoparticles (Prednisolone) on Injured Pulp, <i>In Vivo</i>	out	irrelevant to our topic
Effect of glucose mediated oxidative stress on apoptotic gene expression in gingival mesenchymal stem cells	out	irrelevant to our topic
Effect of microRNA-17 on osteogenic differentiation of advanced glycation end products-stimulated human periodontal ligament stem cells.	out	irrelevant to our topic
Effect of miR-146a/bFGF/PEG-PEI Nanoparticles on Inflammation Response and Tissue Regeneration of Human Dental Pulp Cells	out	irrelevant to our topic
Effect of orthodontic force on dental pulp histomorphology and tissue factor expression:: A systematic review	out	irrelevant to our topic
Effect of Platelet-rich Plasma on Implant Bone Defects in Rabbits Through the FAK/PI3K/AKT Signaling Pathway	out	irrelevant to our topic
Effect of preoperative ibuprofen in controlling postendodontic pain with and without low-level laser therapy in single visit endodontics: A randomized clinical study: Official Publication of Indian Society for Dental Research	out	irrelevant to our topic
Effect of using diode laser on Enterococcus faecalis and its lipoteichoic acid (LTA) in chronic apical periodontitis	out	irrelevant to our topic
Effect of white cell counts on the presence of human herpes simplex virus type-1 in saliva of pediatric oncology patients	out	irrelevant to our topic
Effectiveness of Auditory Distraction and Brief Relaxation Therapy in Reducing Anxiety in Dental Patients Undergoing Extraction: A Randomized Controlled Trial	out	irrelevant to our topic
Effectiveness of Lasers in the Treatment of Dentin Hypersensitivity	out	irrelevant to our topic
Effects of acid concentration on hybrid layer thickness: A SEM study	out	irrelevant to our topic
Effects of Atorvastatin on Periodontitis of Rats Subjected to Glucocorticoid-Induced Osteoporosis.	out	irrelevant to our topic
Effects of chlorpromazine on alveolar bone loss in experimental periodontal disease in rats.	out	irrelevant to our topic
Effects of estrogen deficiency during puberty on maxillary and mandibular growth and associated gene expression – an μCT study on rats	out	irrelevant to our topic
Effects of low-level light therapy on dentin hypersensitivity: a systematic review and meta-analysis	out	irrelevant to our topic
Effects of Metformin in Heart Failure: From Pathophysiological Rationale to Clinical Evidence	out	irrelevant to our topic
Effects of miR-223 on expression of IL-1β and IL-6 in human gingival fibroblasts.	out	irrelevant to our topic
Effects of miR‐224‐5p‐enhanced downregulation of pannexin‐1 on docetaxel‐induced apoptosis in amoeboid‐like CD44high oral cancer cells.	out	irrelevant to our topic
Effects of miRNA‐342‐3p in modulating Hedgehog signaling pathway of human umbilical cord mesenchymal stem cells by down‐regulating Sufu.	out	irrelevant to our topic
Effects of Nonsteroidal Anti-inflammatory Drugs on Osseointegration: A Review.	out	irrelevant to our topic
Effects of pre-applied orthodontic force on the regeneration of periodontal tissues in tooth replantation	out	irrelevant to our topic
Effects of rhBMP-2 gene transfection to periodontal ligament cells on osteogenesis	out	irrelevant to our topic
EFFECTS OF THREE ORAL ANALGESICS ON POSTOPERATIVE PAIN FOLLOWING ROOT CANAL PREPARATION: A CONTROLLED CLINICAL TRIAL	out	irrelevant to our topic
Effektivität Verschiedener Spültechniken Bei Der Entfernung Von Kalziumhydroxid Aus Dem Wurzelkanal	out	Language
Efficacy of Oregano Essential Oil Extract in the Inhibition of Bacterial Lipopolysaccharide (LPS)-Induced Osteoclastogenesis Using RAW 264.7 Murine Macrophage Cell Line—An In-Vitro Study	out	irrelevant to our topic
Efficacy of the Er,Cr:YSGG laser in the Laser Assisted Endodontic Treatment: Blind Randomized Clinical Trial	out	irrelevant to our topic
Efficiency of desensitizing materials in xerostomic patients with head and neck cancer: a comparative clinical study	out	irrelevant to our topic
Effizienz Vier Verschiedener Reinigungsprotokolle Zur Entfernung Artifiziell Platzierter Dentinspäne in Lateralen Wurzelkanalextensionen	out	language
Einfluss Flüssigkeitskontamination Auf Die Verbundfestigkeit von Wurzelkanalsealern (AH Plus und FibreFill<sup>TM</sup>)	out	language
Einfluss Verschiedener Spülprotokolle Auf Den Haftverbund Der Sealer Hybrid Root SEAL Und ActiV GP Zum Wurzelkanaldentin	out	language
Electroacupuncture Alleviates Spared Nerve Injury-Induced Neuropathic Pain And Modulates HMGB1/NF-κB Signaling Pathway In The Spinal Cord	out	irrelevant to our topic
Elevated MicroRNA-128 in Periodontitis Mitigates Tumor Necrosis Factor-α Response via p38 Signaling Pathway in Macrophages.	out	irrelevant to our topic
Eliciting Dentists' and Patients' Preferences for the Treatment of Teeth with Apical Periodontitis	out	irrelevant to our topic
Emerging biogenesis technologies of extracellular vesicles for tissue regenerative therapeutics	out	irrelevant to our topic
Emerging Role of Extracellular Vesicles in Bone Remodeling.	out	irrelevant to our topic
Emerging trends in cone-beam computed tomography utilization	out	irrelevant to our topic
Endosomal TLR-8 Senses microRNA-1294 Resulting in the Production of NFḱB Dependent Cytokines	out	irrelevant to our topic
Engineered Extracellular Vesicles From Human Periodontal-Ligament Stem Cells Increase VEGF/VEGFR2 Expression During Bone Regeneration	out	irrelevant to our topic
Enhancer Control of MicroRNA miR-155 Expression in Epstein-Barr Virus-Infected B Cells.	out	irrelevant to our topic
Enhancing resin-dentin bond effectiveness and durability: The role of ethanol-wet bonding technique, MMP-inhibition (chlorhexidine), and photoinitiator systems	out	irrelevant to our topic
Epigenetic Approaches to the Treatment of Dental Pulp Inflammation and Repair: Opportunities and Obstacles	out	irrelevant to our topic
Epigenetic Changes in Carcinomas derived from Oral Mucosa: A Review.	out	irrelevant to our topic
Epigenetic Control of Autophagy Related Genes Transcription in Pulpitis via JMJD3	out	irrelevant to our topic
Epigenetic inactivation of microRNA gene hsa-mir-9-1 in human breast cancer.	out	irrelevant to our topic
Epigenetic mechanisms in odontogenic tumors: A literature review.	out	irrelevant to our topic
Epigenetic regulation in dental pulp inflammation	out	irrelevant to our topic
Epigenetic regulation of chondrocyte differentiation.	out	irrelevant to our topic
Epigenetic Regulation of Dental Pulp Stem Cell Fate	out	irrelevant to our topic
Epigenetic regulation of dental pulp stem cells and its potential in regenerative endodontics	out	irrelevant to our topic
Epigenetic regulation of matrix metalloproteinases in inflammatory diseases: a narrative review	out	Review
Epigenetics and periodontics: A systematic review.	out	Systematic Review
Epigenetics: A possible answer to the undeciphered etiopathogenesis and behavior of oral lesions.	out	irrelevant to our topic
ESP Abstracts 2012	out	irrelevant to our topic
ESP Abstracts 2014	out	irrelevant to our topic
Establishment of syngeneic murine model for oral cancer therapy.	out	irrelevant to our topic
Estimating Accuracy of the CBVT InVesalius Imaging Software to Measure the Volume of Simulated Periapical Defects in a Human Cadaver Mandible	out	irrelevant to our topic
Estrogen-Mediated MicroRNA-101-3p Expression Represses Hyaluronan Synthase 2 in Synovial Fibroblasts From Idiopathic Condylar Resorption Patients.	out	irrelevant to our topic
Ethanol binge drinking exposure affects alveolar bone quality and aggravates bone loss in experimentally-induced periodontitis	out	irrelevant to our topic
ETHANOL-INDUCED MICRO-RNA ALTERATIONS IN ORAL CANCER CELLS.	out	irrelevant to our topic
Evaluating the efficacy of desensitizing dentifrices on dentinal hypersensitivity management: A scanning electron microscopic analysis	out	irrelevant to our topic
Evaluating the role of tissue microRNA‐27b as a diagnostic marker for oral lichen planus and possible correlation with CD8.	out	irrelevant to our topic
Evaluation of circulating serum 3 types of microRNAas biomarkers of oral squamous cell carcinoma; A pilot study.	out	irrelevant to our topic
Evaluation of different treatment protocols for dentin hypersensitivity: an 18-month randomized clinical trial	out	irrelevant to our topic
Evaluation of immunoglobulin G synthesizing plasma cells in periapical granuloma and cyst.	out	irrelevant to our topic
EVALUATION OF MICRLEAKAGE OF NANO-COMPOSITES USING THREE DIFFERENT RESTORATIVE TECHNIQUES	out	irrelevant to our topic
Evaluation of MicroRNA-146a and Its Targets in Gingival Tissues of Patients With Chronic Periodontitis.	out	irrelevant to our topic
EVALUATION OF MICRORNAS RELATED TO THE SONIC HEDGEHOG PATHWAY IN ORAL CANCER.	out	irrelevant to our topic
EVALUATION OF MIR-181 FAMILY MEMBERS IN ORAL CANCER.	out	irrelevant to our topic
Evaluation of miRNA-expression and clinical tumour parameters in oral squamous cell carcinoma (OSCC).	out	irrelevant to our topic
Evaluation of serum and gingival crevicular fluid microRNA-223, microRNA-203 and microRNA-200b expression in chronic periodontitis patients with and without diabetes type 2.	out	irrelevant to our topic
Evaluation of serum microRNA biomarkers for gastric cancer based on blood and tissue pools profiling: the importance of miR-21 and miR-331.	out	irrelevant to our topic
Evaluation of the furcation area permeability of deciduous molars treated by neodymium:yttrium-aluminum-garnet laser or adhesive	out	irrelevant to our topic
Evolution of Arabidopsis MIR genes generates novel microRNA classes.	out	irrelevant to our topic
Evolution of the mir-181 microRNA family.	out	irrelevant to our topic
Evolution of the myosin heavy chain gene MYH14 and its intronic microRNA miR-499: muscle-specific miR-499 expression persists in the absence of the ancestral host gene.	out	irrelevant to our topic
Excess of a Rassf1-targeting microRNA, miR-193a-3p, perturbs cell division fidelity.	out	irrelevant to our topic
Exhaustive analysis of microRNA in oral squamous cell carcinoma	out	irrelevant to our topic
Exosomal biomarkers in oral diseases.	out	irrelevant to our topic
Exosomal hsa-miR-129-2 and hsa-miR-889 from a 6-microRNA signature might be a potential biomarker for predicting prognosis of papillary thyroid carcinoma.	out	irrelevant to our topic
Exosomal microRNA miR-1246 induces cell motility and invasion through the regulation of DENND2D in oral squamous cell carcinoma.	out	irrelevant to our topic
Exosomal MicroRNA MiR-1246 Promotes Cell Proliferation, Invasion and Drug Resistance by Targeting CCNG2 in Breast Cancer.	out	irrelevant to our topic
Exosome-derived microRNAs in oral squamous cell carcinomas impact disease prognosis.	out	irrelevant to our topic
Exosome-Derived Noncoding RNAs as a Promising Treatment of Bone Regeneration	out	irrelevant to our topic
Exosome-like vesicles derived from Hertwig's epithelial root sheath cells promote the regeneration of dentin-pulp tissue	out	irrelevant to our topic
Exosomes Derived from Stem Cells from the Apical Papilla Promote Dentine-Pulp Complex Regeneration by Inducing Specific Dentinogenesis	out	irrelevant to our topic
Exosomes from EV71‐infected oral epithelial cells can transfer miR‐30a to promote EV71 infection.	out	irrelevant to our topic
Exosomes from Human Periapical Cyst-MSCs: Theranostic Application in Parkinson's Disease	out	irrelevant to our topic
Exosomes from human saliva as a source of microRNA biomarkers.	out	irrelevant to our topic
Exosomes from LPS-Stimulated hDPSCs Activated the Angiogenic Potential of HUVECs In Vitro	out	irrelevant to our topic
Exosomes from TNF-α-treated human gingiva-derived MSCs enhance M2 macrophage polarization and inhibit periodontal bone loss	out	irrelevant to our topic
Exosomes in perspective: a potential surrogate for stem cell therapy.	out	irrelevant to our topic
Exosomes: novel regulators of bone remodelling and potential therapeutic agents for orthodontics.	out	irrelevant to our topic
Expansile keratocystic odontogenic tumor in the maxilla: immunohistochemical studies and review of literature	out	irrelevant to our topic
Exploring the role of Mir204/211 in HNSCC by the combination of bioinformatic analysis of ceRNA and transcription factor regulation.	out	irrelevant to our topic
Expression and localization of special AT-rich sequence binding protein 2 in murine molar development and the pulp-dentin complex of human healthy teeth and teeth with pulpitis	out	irrelevant to our topic
Expression levels and associations of five long non-coding RNAs in gastric cancer and their clinical significance	out	irrelevant to our topic
Expression of autophagy-associated proteins in rat dental irreversible pulpitis	out	Animal
Expression of Ki-67, Oct-4, γ-tubulin and α-tubulin in human tooth development.	out	irrelevant to our topic
Expression of let-7i and miR-192 is associated with resistance to cisplatin-based chemoradiotherapy in patients with larynx and hypopharynx cancer.	out	irrelevant to our topic
Expression of MicroRNAs in Periodontal and Peri-Implant Diseases: A Systematic Review and Meta-Analysis	out	Systematic Review
Expression of miR-146a in primary Sjögren's syndrome.	out	irrelevant to our topic
Expression of NaV-1.7, TNF-α and HSP-70 in experimental flare-up post-extirpated dental pulp tissue through a neuroimmunological approach	out	irrelevant to our topic
Expression of silent information regulator 1 in chronic rhinosinusitis and regulatory effects of inflammatory factors	out	irrelevant to our topic
Expression of stem cell-regulating miRNAs in oral cavity and oropharynx squamous cell carcinoma.	out	irrelevant to our topic
Expression of the miR-302/367 microRNA cluster is regulated by a conserved long non-coding host-gene.	out	irrelevant to our topic
Expression Profiles of Inflammation-associated microRNAs in Periapical Lesions and Human Periodontal Ligament Fibroblasts Inflammation	in in full text
Expression Profiling and Functional Characterization of MicroRNAs in Apical Periodontitis	in in full text
Expression profiling of micro RNAs in RAW264.7 cells treated with a combination of tumor necrosis factor alpha and RANKL during osteoclast differentiation.	out	irrelevant to our topic
Expression profiling the microRNA response to epileptic preconditioning identifies miR-184 as a modulator of seizure-induced neuronal death.	out	irrelevant to our topic
Extracellular vesicle microRNA cargo is correlated with HPV status in oropharyngeal carcinoma.	out	irrelevant to our topic
Extreme intrusive force affects the expression of c-Fos and matrix metallopeptidase 9 in human dental pulp tissues	out	irrelevant to our topic
EZH2 Might Affect Macrophage Chemotaxis and Anti-Inflammatory Factors by Regulating CCL2 in Dental Pulp Inflammation	out	irrelevant to our topic
EZH2 Regulates Lipopolysaccharide-Induced Periodontal Ligament Stem Cell Proliferation and Osteogenesis through TLR4/MyD88/NF-κB Pathway	out	irrelevant to our topic
Factores asociados al uso del servicio de urgencias en el Hospital San Vicente de Arauca entre el período septiembre de 2013 y agosto de 2014.	out	Language
FADD in Cancer: Mechanisms of Altered Expression and Function, and Clinical Implications	out	irrelevant to our topic
Failure of Tooth Formation Mediated by miR-135a Overexpression via BMP Signaling.	out	irrelevant to our topic
Fastigial nucleus stimulation regulates neuroprotection via induction of a novel microRNA, rno-miR-676-1, in middle cerebral artery occlusion rats.	out	irrelevant to our topic
Fibroblast membrane-camouflaged nanoparticles for inflammation treatment in the early stage	out	irrelevant to our topic
Fisiopatología de los odontoblastos: una revisión	out	Language
FSH aggravates bone loss in ovariectomised rats with experimental periapical periodontitis	out	irrelevant to our topic
Function of Dental Follicle Progenitor/Stem Cells and Their Potential in Regenerative Medicine: From Mechanisms to Applications	out	irrelevant to our topic
Functional characterization of miR-708 microRNA in telomerase positive and negative human cancer cells.	out	irrelevant to our topic
Functional Dental Pulp Regeneration: Basic Research and Clinical Translation	out	irrelevant to our topic
Functional high-throughput screening reveals miR-323a-5p and miR-342-5p as new tumor-suppressive microRNA for neuroblastoma.	out	irrelevant to our topic
Functional Regulation of an Autographa californica Nucleopolyhedrovirus-Encoded MicroRNA, AcMNPV-miR-1, in Baculovirus Replication.	out	irrelevant to our topic
Further progress in the detection of thyroid carcinoma: the microRNAs supplant the gene mutations in fine-needle aspiration biopsies.	out	irrelevant to our topic
Fusobacterium nucleatum and colorectal cancer: A review	out	irrelevant to our topic
Gene expression and dental enamel structure in developing mouse incisor.	out	irrelevant to our topic
Gene expression of miRNA-138 and cyclin D1 in oral lichen planus.	out	irrelevant to our topic
Gene expression profile of pulpitis	out	irrelevant to our topic
Gene signatures and expression of miRNAs associated with efficacy of panitumumab in a head and neck cancer phase II trial.	out	irrelevant to our topic
Generating Ins2+/-/miR-133aTg Mice to Model miRNA-Driven Cardioprotection of Human Diabetic Heart.	out	irrelevant to our topic
Genetic and Epigenetic Characterization of Pulpal and Periapical Inflammation	in?	irrelevant to our topic
Genetic regulation and potentially therapeutic application of cancer-associated fibroblasts in oral cancer.	out	irrelevant to our topic
Genetic regulation of inflammation - micro- RNA revolution?	out	irrelevant to our topic
Genetic Risk Score and Its Utility in Diabetic Nephropathy Management	out	irrelevant to our topic
Genetic variants in microRNA-146a (C > G) and microRNA-1269b (G > C) are associated with the decreased risk of oral premalignant lesions, oral cancer, and pharyngeal cancer.	out	irrelevant to our topic
Genetic variants of microRNA processing genes and risk of non‐syndromic orofacial clefts.	out	irrelevant to our topic
Genome-wide analysis of miRNA expression reveals a potential role for miR-144 in brain aging and spinocerebellar ataxia pathogenesis.	out	irrelevant to our topic
Genome-wide microRNA expression profiling in idiopathic non-obstructive azoospermia: significant up-regulation of miR-141, miR-429 and miR-7-1-3p.	out	irrelevant to our topic
Genome-wide microRNA expression profiling in renal cell carcinoma: significant down-regulation of miR-141 and miR-200c.	out	irrelevant to our topic
Genome-wide mRNA-miRNA profiling uncovers a role of the microRNA miR-29b-1-5p/PHLPP1 signalling pathway in Helicobacter pylori-driven matrix metalloproteinase production in gastric epithelial cells.	out	irrelevant to our topic
Genomewide mi RNA profiling of oral lichenoid disorders and oral squamous cell carcinoma.	out	irrelevant to our topic
Genomewide Study of Salivary MicroRNAs for Detection of Oral Cancer.	out	irrelevant to our topic
Glial Network Responses to Polymicrobial Invasion of Dentin	out	irrelevant to our topic
Global microRNA expression profiling identifies MiR-210 associated with tumor proliferation, invasion and poor clinical outcome in breast cancer.	out	irrelevant to our topic
Gram-Positive Bacteria - Enterococcus faecalis; Findings from Shanghai Jiao Tong University School of Medicine Provides New Data on Enterococcus faecalis ( miR -200a contributes to the migration of BMSCs induced by the secretions of E. faecalis via FOXJ1/NFkB/MMPs axis)	out	irrelevant to our topic
Guanine and nucleotide binding protein 3 promotes odonto/osteogenic differentiation of apical papilla stem cells via JNK and ERK signaling pathways	out	irrelevant to our topic
Guidelines for the use of flow cytometry and cell sorting in immunological studies (second edition)	out	irrelevant to our topic
H3K27ac‐induced FOXC2‐AS1 accelerates tongue squamous cell carcinoma by upregulating E2F3.	out	irrelevant to our topic
Heat Shock70 Protein Genes and Genetic Susceptibility to Apical Periodontitis	out	irrelevant to our topic
Hedgehog signaling pathway and vitamin D receptor gene variants as potential risk factors in odontogenic cystic lesions	out	irrelevant to our topic
Hepatic mRNA, microRNA, and miR-34a-target responses in mice after 28 days exposure to doses of benzo(a)pyrene that elicit DNA damage and mutation.	out	irrelevant to our topic
Herpes simplex virus 2 microRNA miR-H6 is a novel latency-associated transcript-associated microRNA, but reduction of its expression does not influence the establishment of viral latency or the recurrence phenotype.	out	irrelevant to our topic
Herpesvirus-bacteria synergistic interaction in periodontitis	out	irrelevant to our topic
Herpesvirus-encoded microRNAs detected in human gingiva alter host cell transcriptome and regulate viral infection	out	irrelevant to our topic
Herpesviruses and MicroRNAs: New Pathogenesis Factors in Oral Infection and Disease?	out	irrelevant to our topic
Herpesviruses in asymptomatic apical periodontitis lesions: an immunohistochemical approach.	out	irrelevant to our topic
Heterogeneity of mesenchymal stem cells in cartilage regeneration: from characterization to application	out	irrelevant to our topic
Hidden in plain sight: The effects of BCG vaccination in the COVID‐19 pandemic	out	irrelevant to our topic
High Glucose Enhances the Odonto/Osteogenic Differentiation of Stem Cells from Apical Papilla via NF-KappaB Signaling Pathway	out	irrelevant to our topic
High miR-21 expression in oral carcinoma is associated with perineural invasion and worse prognosis.	out	irrelevant to our topic
High resolution of microRNA signatures in human whole saliva	out	irrelevant to our topic
HIGH THROUGHPUT SEQUENCING REVEALS CIRCADIAN RHYTHM GENE RORΑ IS COOPERATIVELY SUPPRESSED BY MULTIPLE MICRORNAS IN ORAL SQUAMOUS CELL CARCINOMA.	out	irrelevant to our topic
High-Mobility Group Box 1 Protein Signaling in Painful Diabetic Neuropathy	out	irrelevant to our topic
High-quality human preimplantation embryos stimulate endometrial stromal cell migration via secretion of microRNA hsa-miR-320a.	out	irrelevant to our topic
High-throughput microRNA profile in adult and pediatric primary glioblastomas: the role of miR-10b-5p and miR-630 in the tumor aggressiveness.	out	irrelevant to our topic
Histological and immunohistochemical study on the apical granuloma.	out	irrelevant to our topic
Histone Acetylation as a Regenerative Target in the Dentine-Pulp Complex	out	irrelevant to our topic
Histone Lys demethylase KDM3C demonstrates anti-inflammatory effects by suppressing NF-κB signaling and osteoclastogenesis	out	irrelevant to our topic
HISTOPATHOLOGICAL EVALUATION OF ODONTOGENIC KERATOCYSTS AND RADICULAR CYSTS IN PESHAWAR	out	irrelevant to our topic
HIV-1 Vpr Inhibits Kaposi's Sarcoma-Associated Herpesvirus Lytic Replication by Inducing MicroRNA miR-942-5p and Activating NF-kappaB Signaling.	out	irrelevant to our topic
HNOCDB: A comprehensive database of genes and miRNAs relevant to head and neck and oral cancer	out	irrelevant to our topic
Host defense peptides clavanins A and MO reduce in vitro osteoclastogenesis.	out	irrelevant to our topic
Host MicroRNA miR-197 Plays a Negative Regulatory Role in the Enterovirus 71 Infectious Cycle by Targeting the RAN Protein.	out	irrelevant to our topic
How massed practice improves visual expertise in reading panoramic radiographs in dental students: An eye tracking study	out	irrelevant to our topic
hsa‐miR‐374b‐5p regulates expression of the gene U2AF homology motif (UHM) kinase 1.	out	irrelevant to our topic
Human and herpesvirus microRNAs in periodontal disease.	out	irrelevant to our topic
Human cytomegalovirus clinical strain-specific microRNA miR-UL148D targets the human chemokine RANTES during infection.	out	irrelevant to our topic
Human cytomegalovirus microRNA miR-US25-1-5p inhibits viral replication by targeting multiple cellular genes during infection.	out	irrelevant to our topic
Human periapical cyst-derived stem cells can be a smart “lab-on-a-cell” to investigate neurodegenerative diseases and the related alteration of the exosomes’ content	out	irrelevant to our topic
Human Platelet Dysregulation by Antiretroviral Drugs and Cigarette Smoke in vitro	out	irrelevant to our topic
Human Retinal Progenitor Cells Derived Small Extracellular Vesicles Delay Retinal Degeneration: A Paradigm for Cell-free Therapy	out	irrelevant to our topic
Human stem cells – sources, sourcing and in vitro methods	out	irrelevant to our topic
IADR-APR research symposium 2017	out	irrelevant to our topic
Identification and integrated analysis of differentially expressed long non‐coding RNAs associated with periodontitis in humans.	out	irrelevant to our topic
Identification of a novel microRNA profile including miR-106b, miR-17, miR-20b, miR-18a and miR-93 in the metastasis of nasopharyngeal carcinoma.	out	irrelevant to our topic
Identification of a novel salivary biomarker miR-143-3p for periodontal diagnosis: A proof of concept study.	out	irrelevant to our topic
Identification of a novel tumor suppressive microrna in human oral cancer cells.	out	irrelevant to our topic
Identification of Deregulated Mirnas in Oral Squamous Cell Carcinoma.	out	irrelevant to our topic
Identification of IGF-1-enhanced cytokine expressions targeted by miR-181d in glioblastomas via an integrative miRNA/mRNA regulatory network analysis.	out	irrelevant to our topic
Identification of MicroRNAs by Microarray Analysis and Prediction of Target Genes Involved in Osteogenic Differentiation of Human Periodontal Ligament Stem Cells.	out	irrelevant to our topic
Identification of miR-4644 as a suitable endogenous normalizer for circulating miRNA quantification in hepatocellular carcinoma.	out	irrelevant to our topic
Identification of miR-93 as a suitable miR for normalizing miRNA in plasma of tuberculosis patients.	out	irrelevant to our topic
Identification of miRNA and genes involving in osteosarcoma by comprehensive analysis of microRNA and copy number variation data.	out	irrelevant to our topic
Identification of miRNA in Sheep Intramuscular Fat and the Role of miR-193a-5p in Proliferation and Differentiation of 3T3-L1.	out	Animal
Identification of novel key lncRNAs involved in periodontitis by weighted gene co‐expression network analysis.	out	irrelevant to our topic
Identification of potential therapeutic target genes, key miRNAs and mechanisms in oral lichen planus by bioinformatics analysis.	out	irrelevant to our topic
Identification of regulatory mRNA and microRNA for differentiation into cementoblasts and periodontal ligament cells.	out	irrelevant to our topic
Identification of target genes and pathways associated with chicken microRNA miR-143.	out	Animal
Identification of the miR-106b~25 microRNA cluster as a proto-oncogenic PTEN-targeting intron that cooperates with its host gene MCM7 in transformation.	out	irrelevant to our topic
Identification of the miRNA-mRNA regulatory pathways and a miR-21-5p based nomogram model in clear cell renal cell carcinoma.	out	irrelevant to our topic
Identification of the receptor tyrosine kinase AXL in breast cancer as a target for the human miR-34a microRNA.	out	irrelevant to our topic
IFN-[gamma] regulates human dental pulp stem cells behavior via NF-[kappa]B and MAPK signaling	out	irrelevant to our topic
IFN-γ regulates human dental pulp stem cells behavior via NF-κB and MAPK signaling	out	irrelevant to our topic
IgD-Fc-Ig fusion protein, a new biological agent, inhibits T cell function in CIA rats by inhibiting IgD-IgDR-Lck-NF-κB signaling pathways	out	irrelevant to our topic
Immune Response Profile against Persistent Endodontic Pathogens Candida albicans and Enterococcus faecalis In Vitro.	out	irrelevant to our topic
Immunoexpression of interleukin 17 in apical periodontitis lesions.	out	irrelevant to our topic
Immunohistochemical analysis of ADAMTS-1, versican and pEGFR expressions in periapical granuloma and radicular cyst.	out	irrelevant to our topic
Immunological Pathways Triggered by Porphyromonas gingivalis and Fusobacterium nucleatum: Therapeutic Possibilities?	out	irrelevant to our topic
Immunomodulation in the Treatment of Periodontitis: Progress and Perspectives	out	irrelevant to our topic
Immunomodulation of Interleukin-34 and its Potential Significance as a Disease Biomarker and Therapeutic Target	out	irrelevant to our topic
Immunomodulatory roles of human herpesvirus-encoded microRNA in host-virus interaction	out	irrelevant to our topic
Impact of circulating microRNA test (miRNA-371a-3p) on appropriateness of treatment and cost outcomes in patients with Stage I non-seminomatous germ cell tumours.	out	irrelevant to our topic
Impact of Epigenetic Alterations in the Development of Oral Diseases	out	irrelevant to our topic
Impacto de la posición socioeconómica sobre los defectos de desarrollo del esmalte en dentición primaria.	out	language
Improving accuracy of RNA-based diagnosis and prognosis of oral cancer by using noninvasive methods.	out	irrelevant to our topic
In silico identification of common and specific signatures in coronary heart diseases	out	irrelevant to our topic
In situ measurement of miR-138 expression in oral squamous cell carcinoma tissue supports the role of this microRNA as a tumor suppressor.	out	irrelevant to our topic
In vitro biocompatibility and bioactivity of calcium silicate-based bioceramics in endodontics (Review)	out	irrelevant to our topic
In vitro effects of N-acetyl cysteine alone and in combination with antibiotics on Prevotella intermedia	out	irrelevant to our topic
In vitro regulation of CCL3 and CXCL12 by bacterial by-products is dependent on site of origin of human oral fibroblasts	out	irrelevant to our topic
Incidence of Pain After Non-Surgical Endodontic Procedures with Special Consideration of HIV Status	out	irrelevant to our topic
Incidental Findings on CBCT by Field of View and Presence or Absence on 2D Imaging	out	irrelevant to our topic
Increase of microRNA miR-31 level in plasma could be a potential marker of oral cancer.	out	irrelevant to our topic
Induction of autophagy protects human dental pulp cells from lipopolysaccharide-induced pyroptotic cell death	out	irrelevant to our topic
Induction of somatic cell reprogramming using the microRNA miR-302. [Review]	out	irrelevant to our topic
Inflammasomes in Alveolar Bone Loss	out	irrelevant to our topic
Inflammation-induced overexpression of microRNA-223-3p regulates odontoblastic differentiation of human dental pulp stem cells by targeting SMAD3	in in full text
Inflammatory Cytokines Interleukin-1β and Tumour Necrosis Factor-α - Novel Biomarkers for the Detection of Periodontal Diseases: a Literature Review.	out	Review
Inflammatory Markers and Incidence of other Autoimmune Diseases in Patients with Oral Lichen Planus.	out	irrelevant to our topic
Influence of smoking on methylation and hydroxymethylation levels in global DNA and specific sites of KRT14, KRT19, MIR-9-3 and MIR-137 genes of oral mucosa.	out	irrelevant to our topic
Inhibition of carrageenan-induced dental inflammatory responses owing to decreased TRPV1 activity by Dexmedetomidine	out	irrelevant to our topic
Inhibition of CRY2 by STAT3/miRNA-7-5p Promotes Osteoblast Differentiation through Upregulation of CLOCK/BMAL1/P300 Expression	out	irrelevant to our topic
Inhibition of Kaposi's sarcoma-associated herpesvirus lytic replication by HIV-1 Nef and cellular microRNA hsa-miR-1258.	out	irrelevant to our topic
Inhibition of microRNA-302 (miR-302) by bone morphogenetic protein 4 (BMP4) facilitates the BMP signaling pathway.	out	irrelevant to our topic
Inhibition of the miR-17-92 Cluster Separates Stages of Palatogenesis.	out	irrelevant to our topic
Insight into the roles of melatonin in bone tissue and bone-related diseases (Review)	out	Review
Insights into the Effects of Mesenchymal Stem Cell-Derived Secretome in Parkinson’s Disease	out	irrelevant to our topic
Insights into the September 2019 Issue of the Journal of Endodontics.	out	irrelevant to our topic
Integrated analyses of zebrafish miRNA and mRNA expression profiles identify miR-29b and miR-223 as potential regulators of optic nerve regeneration.	out	irrelevant to our topic
Integrated analysis miRNA and mRNA profiling in patients with severe oligozoospermia reveals miR-34c-3p downregulates PLCXD3 expression.	out	irrelevant to our topic
Integrated analysis of long noncoding RNA‐associated competing endogenous RNA network in periodontitis.	out	irrelevant to our topic
Integrated analysis of microRNA and mRNA expression profiles in the left atrium of patients with nonvalvular paroxysmal atrial fibrillation: Role of miR-146b-5p in atrial fibrosis.	out	irrelevant to our topic
Integrated analysis of microRNA and mRNA expression profiling identifies BAIAP3 as a novel target of dysregulated hsa-miR-1972 in age-related white matter lesions.	out	irrelevant to our topic
Integrated analysis of mRNA and miRNA profiles revealed the role of miR-193 and miR-210 as potential regulatory biomarkers in different molecular subtypes of breast cancer.	out	irrelevant to our topic
Integrated microRNA and mRNA Signature Associated with the Transition from the Locally Confined to the Metastasized Clear Cell Renal Cell Carcinoma Exemplified by miR-146-5p.	out	irrelevant to our topic
Integrated miRNA and mRNA expression analysis uncovers drug targets in laryngeal squamous cell carcinoma patients.	out	irrelevant to our topic
Integrated mRNA-microRNA profiling of human NK cell differentiation identifies MiR-583 as a negative regulator of IL2Rgamma expression.	out	irrelevant to our topic
Integrating microRNA expression, miRNA-mRNA regulation network and signal pathway: a novel strategy for lung cancer biomarker discovery.	out	irrelevant to our topic
Integration of microRNA miR-122 in hepatic circadian gene expression.	out	irrelevant to our topic
Integrative analysis of differential miRNA and functional study of miR-21 by seed-targeting inhibition in multiple myeloma cells in response to berberine.	out	irrelevant to our topic
Integrative Analysis of Long Noncoding RNA (lncRNA), microRNA (miRNA) and mRNA Expression and Construction of a Competing Endogenous RNA (ceRNA) Network in Metastatic Melanoma.	out	irrelevant to our topic
Integrative analysis of mRNA and miRNA expression profiles in oral lichen planus: preliminary results.	out	irrelevant to our topic
Integrative mRNA/miRNA expression analysis in healing human gingiva.	out	irrelevant to our topic
Interleukin 21 (IL-21)/microRNA-29 (miR-29) axis is associated with natural resistance to HIV-1 infection.	out	irrelevant to our topic
Interleukin-1b levels in crevicular fluid obtained from mini-implant site and distal to canine during en-masse retraction	out	irrelevant to our topic
Interleukin-8, CXCL1, and MicroRNA miR-146a Responses to Probiotic Escherichia coli Nissle 1917 and Enteropathogenic E. coli in Human Intestinal Epithelial T84 and Monocytic THP-1 Cells after Apical or Basolateral Infection.	out	irrelevant to our topic
International Conference Cybernetic Modelling of Biological Systems MCSB 2021	out	irrelevant to our topic
Investigation of the underlying genes and mechanism of familial hypercholesterolemia through bioinformatics analysis	out	irrelevant to our topic
Involvement of miR‐146a‐5p/neurogenic locus notch homolog protein 1 in the proliferation and differentiation of STRO‐1+ human dental pulp stem cells.	out	irrelevant to our topic
iRoot SP Promotes Osteo/Odontogenesis of Bone Marrow Mesenchymal Stem Cells via Activation of NF-κB and MAPK Signaling Pathways	out	irrelevant to our topic
Is there an association between IFN-γ +874A/T polymorphism and periodontitis susceptibility?: A meta-analysis	out	irrelevant to our topic
Is There Such a Thing as a Genuine Cancer Stem Cell Marker? Perspectives from the Gut, the Brain and the Dental Pulp	out	irrelevant to our topic
Ischemic postconditioning attenuates the inflammatory response in ischemia/reperfusion myocardium by upregulating miR-499 and inhibiting TLR2 activation	out	irrelevant to our topic
Journal of Clinical Medicine Issues 154 Research Articles in June 2019 Edition	out	irrelevant to our topic
Journal of Oral Pathology &amp; Medicine Issues 12 Research Articles in November 2019 Edition	out	irrelevant to our topic
Key Markers and Epigenetic Modifications of Dental-Derived Mesenchymal Stromal Cells	out	irrelevant to our topic
Langzeitdichtigkeit Von Wurzelkanalfüllungen Mit Verschiedenen Sealern	out	Language
Lasers to prevent dental caries: a systematic review	out	irrelevant to our topic
Latency-associated viral interleukin-10 (IL-10) encoded by human cytomegalovirus modulates cellular IL-10 and CCL8 Secretion during latent infection through changes in the cellular microRNA hsa-miR-92a.	out	irrelevant to our topic
Let-7c restores radiosensitivity and chemosensitivity and impairs stemness in oral cancer cells through inhibiting interleukin-8.	out	irrelevant to our topic
Limited Field of View CBCT in Specialty Endodontic Practice: An Eye Tracking Pilot Study	out	irrelevant to our topic
Lin28 promotes dental pulp cell proliferation via upregulation of cyclin-dependent proteins and interaction with let-7a/IGF2BP2 pathways	out	irrelevant to our topic
Lipopolysaccharide Induces the Migration of Human Dental Pulp Cells by Up-regulating miR-146a	out	irrelevant to our topic
Lipoteichoic acid from an Enterococcus faecalis clinical strain promotes TNF-α expression through the NF-κB and p38 MAPK signaling pathways in differentiated THP-1 macrophages	out	irrelevant to our topic
Liquid biopsy = Individualized cancer management: Diagnosis, monitoring treatment and checking recurrence and metastasis.	out	irrelevant to our topic
Liquid Biopsy in Head and Neck Cancer: Promises and Challenges.	out	irrelevant to our topic
Liver & Pancreas	out	irrelevant to our topic
Lnc‐NTF3‐5 promotes osteogenic differentiation of maxillary sinus membrane stem cells via sponging miR‐93‐3p.	out	irrelevant to our topic
LncRNA AWPPH overexpression predicts the recurrence of periodontitis	out	irrelevant to our topic
lncRNA H19 facilitates the proliferation and differentiation of human dental pulp stem cells via EZH2-dependent LATS1 methylation	out	irrelevant to our topic
LncRNA LEF1-AS1 promotes osteogenic differentiation of dental pulp stem cells via sponging miR-24-3p	out	irrelevant to our topic
LncRNA MAFG‐AS1 regulates human periodontal ligament stem cell proliferation and Toll‐like receptor 4 expression.	out	irrelevant to our topic
LncRNA MALAT1 regulates inflammatory cytokine production in lipopolysaccharide‐stimulated human gingival fibroblasts through sponging miR‐20a and activating TLR4 pathway.	out	irrelevant to our topic
LncRNA‐mediated ceRNA network was identified as a crucial determinant of differential effects in periodontitis and periimplantitis by high‐throughput sequencing.	out	irrelevant to our topic
Local delivery of simvastatin maintains tooth anchorage during mechanical tooth moving via anti‐inflammation property and AMPK/MAPK/NF‐kB inhibition	out	irrelevant to our topic
Long intergenic non-protein coding RNA 1094 (LINC01094) promotes the progression of breast cancer (BC) by regulating the microRNA-340-5p (miR-340-5p)/E2F transcription factor 3 (E2F3) axis.	out	irrelevant to our topic
Long non-coding RNA DNM3OS/miR-204-5p/HIP1 axis modulates oral cancer cell viability and migration.	out	irrelevant to our topic
Long non-coding RNA MALAT1 promotes odontogenic differentiation of human dental pulp stem cells by impairing microRNA-140-5p-dependent downregulation of GIT2	out	irrelevant to our topic
Long non-coding RNAs are novel players in oral inflammatory disorders, potentially premalignant oral epithelial lesions and oral squamous cell carcinoma (Review)	out	Review
Long Noncoding RNA Sponges miR-454 to Promote Osteogenic Differentiation in Maxillary Sinus Membrane Stem Cells.	out	irrelevant to our topic
Long Term Delta-9-tetrahydrocannabinol Administration Inhibits Proinflammatory Responses in Minor Salivary Glands of Chronically Simian Immunodeficieny Virus Infected Rhesus Macaques	out	irrelevant to our topic
Long‐term exposure to cigarette smoke influences characteristics in human gingival fibroblasts.	out	irrelevant to our topic
Loss of heterozygosity of MIR15A/MIR16-1, negative regulators of the antiapoptotic gene BCL2, is not common in odontogenic keratocysts.	out	irrelevant to our topic
Loss of microRNA cluster miR-29a/b-1 in sporadic Alzheimer's disease correlates with increased BACE1/beta-secretase expression.	out	irrelevant to our topic
Loss of PTEN Expression Is Associated With High MicroRNA 24 Level and Poor Prognosis in Patients With Tongue Squamous Cell Carcinoma.	out	irrelevant to our topic
Low level laser therapy, Er,Cr:YSGG laser and fluoride varnish for treatment of dentin hypersensitivity after periodontal surgery: A randomized clinical trial	out	irrelevant to our topic
Low-level laser therapy of dentin hypersensitivity: a short-term clinical trial	out	irrelevant to our topic
Macrophage polarization differs between apical granulomas, radicular cysts, and dentigerous cysts.	out	irrelevant to our topic
Mandibular Anæsthesia	out	irrelevant to our topic
Mantle Cell Lymphoma: Combined Extranodal/Nodal Involvement of The Head And Neck With Multifocal Oral Manifestation.	out	irrelevant to our topic
Maternal high-fat diet consumption modulates hepatic lipid metabolism and microRNA-122 (miR-122) and microRNA-370 (miR-370) expression in offspring.	out	irrelevant to our topic
Maxillofacial-Derived Mesenchymal Stem Cells: Characteristics and Progress in Tissue Regeneration	out	irrelevant to our topic
Mechanism and Method for Generating Tumor-Free iPS Cells Using Intronic MicroRNA miR-302 Induction.	out	irrelevant to our topic
Mechanism and method for generating tumor-free iPS cells using intronic microRNA miR-302 induction. [Review]	out	irrelevant to our topic
Mechanism of Mongolian medical warm acupuncture in treating insomnia by regulating miR-101a in rats with insomnia	out	irrelevant to our topic
Mechanisms and Models of Pain in Head and Neck Cancer Irradiation	out	irrelevant to our topic
Mechanisms by Which Small RNAs Affect Bacterial Activity.	out	irrelevant to our topic
Melatonin Improves Levels of Zn and Cu in the Muscle of Diabetic Obese Rats	out	irrelevant to our topic
Melatonin regulates CRE-dependent gene transcription underlying osteoblast proliferation by activating Src and PKA in parallel	out	irrelevant to our topic
Mesenchymal stem cells and their chondrogenic differentiated and dedifferentiated progeny express chemokine receptor CCR9 and chemotactically migrate toward CCL25 or serum	out	irrelevant to our topic
Mesenchymal Stem Cells as a Bio Organ for Treatment of Female Infertility	out	irrelevant to our topic
Mesenchymal Stem Cells as Promoters, Enhancers, and Playmakers of the Translational Regenerative Medicine 2018	out	irrelevant to our topic
Mesenchymal Stem Cells Based Treatment in Dental Medicine: A Narrative Review	out	irrelevant to our topic
Mesenchymal Stem Cells for Craniofacial Tissue Regeneration: Designing Hydrogel Delivery Vehicles.	out	irrelevant to our topic
Metalloproteinase 14 (MMP-14) and hsa-miR-410-3p expression in human inflamed dental pulp and odontoblasts	in in full text
Methodological quality assessment of paper-based systematic reviews published in oral health	out	irrelevant to our topic
Methylation of microRNA-9 is a specific and sensitive biomarker for oral and oropharyngeal squamous cell carcinomas	out	irrelevant to our topic
Methylglyoxal-Dependent Glycative Stress Is Prevented by the Natural Antioxidant Oleuropein in Human Dental Pulp Stem Cells through Nrf2/Glo1 Pathway	out	irrelevant to our topic
MICRO RNAS AS PREDICTIVE MARKERS OF ORAL LEUKOPLAKIA THAT PROGRESS TO CANCER.	out	irrelevant to our topic
Micro-ribonucleic acid 143 (MiR-143) inhibits oral squamous cell carcinoma (OSCC) cell migration and invasion by downregulation of phospho-c-Met through targeting CD44 v3.	out	irrelevant to our topic
MICROARN-URILE SALIVARE CA BIOMARKERI PENTRU MALIGNITATEA ORALĂ.	out	language
Microarray analysis of peri-implant tissue behaviour next to different titanium implant surfaces.	out	irrelevant to our topic
Microarray expression in peri-implant tissue next to different titanium implant surfaces predicts clinical outcomes: a split-mouth study.	out	irrelevant to our topic
Microbiome succession with increasing age in three oral sites	out	irrelevant to our topic
Microenvironment Influences Odontogenic Mesenchymal Stem Cells Mediated Dental Pulp Regeneration	out	irrelevant to our topic
Microhardness of normal and rachitic teeth	out	irrelevant to our topic
MicroRNA --320a regulates invasion and migration of salivary gland adenoid cystic carcinoma.	out	irrelevant to our topic
MicroRNA 145 gene expression in oral squamous cell carcinoma	out	irrelevant to our topic
MicroRNA 21 (miR-21) and miR-181b couple with NFI-A to generate myeloid-derived suppressor cells and promote immunosuppression in late sepsis.	out	irrelevant to our topic
MicroRNA 224 Regulates Ion Transporter Expression in Ameloblasts To Coordinate Enamel Mineralization	out	irrelevant to our topic
MicroRNA and cellular targets profiling reveal miR-217 and miR-576-3p as proviral factors during Oropouche infection.	out	irrelevant to our topic
MicroRNA and oral cancer: Future perspectives	out	irrelevant to our topic
MicroRNA array analysis finds elevated serum miR-1290 accurately distinguishes patients with low-stage pancreatic cancer from healthy and disease controls.	out	irrelevant to our topic
MicroRNA Bta-miR-181a regulates the biosynthesis of bovine milk fat by targeting ACSL1.	out	irrelevant to our topic
MicroRNA cloning and sequencing in osteosarcoma cell lines: differential role of miR-93.	out	irrelevant to our topic
MicroRNA cluster miR-17-92 regulates neural stem cell expansion and transition to intermediate progenitors in the developing mouse neocortex.	out	irrelevant to our topic
MicroRNA control of tooth formation and eruption.	out	irrelevant to our topic
MicroRNA Deregulations in Head and Neck Squamous Cell Carcinomas.	out	irrelevant to our topic
MicroRNA expression and identification of putative miRNA targets in ovarian cancer.	out	irrelevant to our topic
MicroRNA expression correlates with disease recurrence and overall survival in oral squamous cell carcinoma.	out	irrelevant to our topic
microRNA expression in hepatitis B virus infected primary treeshrew hepatocytes and the independence of intracellular miR-122 level for de novo HBV infection in culture.	out	irrelevant to our topic
MicroRNA expression in inflamed and noninflamed gingival tissues from Japanese patients.	out	irrelevant to our topic
MicroRNA expression in lung tissues of asbestos-exposed mice: Upregulation of miR-21 and downregulation of tumor suppressor genes Pdcd4 and Reck.	out	irrelevant to our topic
MicroRNA Expression in Rat Apical Periodontitis Bone Lesion	out	animal
MicroRNA expression is associated with human papillomavirus status and prognosis in mucosal head and neck squamous cell carcinomas.	out	irrelevant to our topic
MicroRNA expression is dysregulated in narcolepsy: a new evidence?	out	irrelevant to our topic
microRNA expression profile and identification of miR-29 as a prognostic marker and pathogenetic factor by targeting CDK6 in mantle cell lymphoma.	out	irrelevant to our topic
MicroRNA Expression Profile Reveals miR-17-92 and miR-143-145 Cluster in Synchronous Colorectal Cancer.	out	irrelevant to our topic
MicroRNA expression profiles in chronic epilepsy rats and neuroprotection from seizures by targeting miR-344a.	out	irrelevant to our topic
MicroRNA Expression Profiles in External Cervical Resorption.	out	irrelevant to our topic
MicroRNA expression profiles in peri-miniscrew implant crevicular fluid in orthodontics: a pilot study.	out	irrelevant to our topic
MicroRNA expression profiling of human bone marrow mesenchymal stem cells during osteogenic differentiation reveals Osterix regulation by miR-31.	out	irrelevant to our topic
MicroRNA expression profiling of nicotine-treated human periodontal ligament cells.	out	irrelevant to our topic
MicroRNA expression profiling of the developing murine molar tooth germ and the developing murine submandibular salivary gland	out	irrelevant to our topic
MicroRNA Gene Expression Signature Driven by miR-9 Overexpression in Ovarian Clear Cell Carcinoma.	out	irrelevant to our topic
MicroRNA gga-miR-200a-3p modulates immune response via MAPK signaling pathway in chicken afflicted with necrotic enteritis.	out	animal
MicroRNA hsa-mir-3923 serves as a diagnostic and prognostic biomarker for gastric carcinoma.	out	irrelevant to our topic
MicroRNA in schizophrenia: genetic and expression analysis of miR-130b (22q11).	out	irrelevant to our topic
microRNA in situ hybridization for miR-211 detection as an ancillary test in melanoma diagnosis.	out	irrelevant to our topic
MicroRNA in vivo precipitation identifies miR-151-3p as a computational unpredictable miRNA to target Stat3 and inhibits innate IL-6 production.	out	irrelevant to our topic
MicroRNA let-7a represses chemoresistance and tumourigenicity in head and neck cancer via stem-like properties ablation	out	irrelevant to our topic
MicroRNA let-7c-5p promotes osteogenic differentiation of dental pulp stem cells by inhibiting lipopolysaccharide-induced inflammation via HMGA2/PI3K/Akt signal blockade.	out	irrelevant to our topic
MicroRNA let-7c-5p Suppressed Lipopolysaccharide-Induced Dental Pulp Inflammation by Inhibiting Dentin Matrix Protein-1-Mediated Nuclear Factor kappa B (NF-κB) Pathway In Vitro and In Vivo	out	irrelevant to our topic
MicroRNA let‐7c‐5p promotes osteogenic differentiation of dental pulp stem cells by inhibiting lipopolysaccharide‐induced inflammation via HMGA2/PI3K/Akt signal blockade	out	irrelevant to our topic
MicroRNA Library-Based Functional Screening Identified Androgen-Sensitive miR-216a as a Player in Bicalutamide Resistance in Prostate Cancer.	out	irrelevant to our topic
MicroRNA miR-107 is overexpressed in pituitary adenomas and inhibits the expression of aryl hydrocarbon receptor-interacting protein in vitro.	out	irrelevant to our topic
MicroRNA miR-122 as a therapeutic target for oligonucleotides and small molecules. [Review]	out	irrelevant to our topic
MicroRNA miR-137 regulates neuronal maturation by targeting ubiquitin ligase mind bomb-1.	out	irrelevant to our topic
MicroRNA miR-146a is induced by HTLV-1 tax and increases the growth of HTLV-1-infected T-cells.	out	irrelevant to our topic
MicroRNA miR-155 inhibits cyprinid herpesvirus 3 replication via regulating AMPK-MAVS-IFN axis.	out	irrelevant to our topic
MicroRNA miR-181-A Rheostat for TCR Signaling in Thymic Selection and Peripheral T-Cell Function. [Review]	out	irrelevant to our topic
MicroRNA miR-183 functions as an oncogene by targeting the transcription factor EGR1 and promoting tumor cell migration.	out	irrelevant to our topic
MicroRNA miR-191 targets the zinc finger transcription factor Egr-1 and suppresses intimal thickening after carotid injury.	out	irrelevant to our topic
MicroRNA miR-21 regulates the metastatic behavior of B16 melanoma cells.	out	irrelevant to our topic
MicroRNA miR-212 regulates PDCD4 to attenuate Abeta25-35-induced neurotoxicity via PI3K/AKT signaling pathway in Alzheimer's disease.	out	irrelevant to our topic
MicroRNA miR-29c down-regulation leading to de-repression of its target DNA methyltransferase 3a promotes ischemic brain damage.	out	irrelevant to our topic
MicroRNA miR-29c regulates RAG1 expression and modulates V(D)J recombination during B cell development.	out	irrelevant to our topic
MicroRNA miR-302 inhibits the tumorigenicity of endometrial cancer cells by suppression of Cyclin D1 and CDK1.	out	irrelevant to our topic
MicroRNA miR-320a modulates induction of HO-1, GCLM and OKL38 by oxidized phospholipids in endothelial cells.	out	irrelevant to our topic
MicroRNA mir-346 targets the 5'-untranslated region of receptor-interacting protein 140 (RIP140) mRNA and up-regulates its protein expression.	out	irrelevant to our topic
MicroRNA miR-34a downregulates FOXP1 during DNA damage response to limit BCR signalling in chronic lymphocytic leukaemia B cells.	out	irrelevant to our topic
MicroRNA miR-374, a potential radiosensitizer for carbon ion beam radiotherapy.	out	irrelevant to our topic
MicroRNA miR-491-5p targeting both TP53 and Bcl-XL induces cell apoptosis in SW1990 pancreatic cancer cells through mitochondria mediated pathway.	out	irrelevant to our topic
MicroRNA miR-7 and miR-17-92 in the Arcuate Nucleus of Mouse Hypothalamus Regulate Sex-Specific Diet-Induced Obesity.	out	irrelevant to our topic
MicroRNA miR-7 Regulates Secretion of Insulin-Like Peptides.	out	irrelevant to our topic
MicroRNA miR-885-5p targets CDK2 and MCM5, activates p53 and inhibits proliferation and survival.	out	irrelevant to our topic
MicroRNA miR-886-5p inhibits apoptosis by down-regulating Bax expression in human cervical carcinoma cells.	out	irrelevant to our topic
MicroRNA miR-93 promotes tumor growth and angiogenesis by targeting integrin-beta8.	out	irrelevant to our topic
MicroRNA Modulation in Obesity and Periodontitis.	out	irrelevant to our topic
MicroRNA Modulation of Host Immune Response and Inflammation Triggered by Helicobacter pylori	out	irrelevant to our topic
MicroRNA Networks Modulate Oxidative Stress in Cancer	out	irrelevant to our topic
MicroRNA Profile Identifies miR-6165 Could Suppress Gastric Cancer Migration and Invasion by Targeting STRN4.	out	irrelevant to our topic
MicroRNA Profiling Identifies miR-196a as Differentially Expressed in Childhood Adrenoleukodystrophy and Adult Adrenomyeloneuropathy.	out	irrelevant to our topic
MicroRNA Profiling in Adipose Before and After Weight Loss Highlights the Role of miR-223-3p and the NLRP3 Inflammasome.	out	irrelevant to our topic
MicroRNA profiling in Chinese patients with primary Sjogren syndrome reveals elevated miRNA-181a in peripheral blood mononuclear cells.	out	irrelevant to our topic
MicroRNA profiling in locally advanced esophageal cancer indicates a high potential of miR-192 in prediction of multimodality therapy response.	out	irrelevant to our topic
MicroRNA profiling of peripheral nerve sheath tumours identifies miR-29c as a tumour suppressor gene involved in tumour progression.	out	irrelevant to our topic
MicroRNA Profiling of Salivary Duct Carcinoma Versus Her2/Neu Overexpressing Breast Carcinoma Identify miR-10a as a Putative Breast Related Oncogene.	out	irrelevant to our topic
MicroRNA profiling of Sendai virus-infected A549 cells identifies miR-203 as an interferon-inducible regulator of IFIT1/ISG56.	out	irrelevant to our topic
MicroRNA profiling reveals aberrant microRNA expression in adult ETP-ALL and functional studies implicate a role for miR-222 in acute leukemia.	out	irrelevant to our topic
MicroRNA profiling reveals dysregulated microRNAs and their target gene regulatory networks in cemento-ossifying fibroma.	out	irrelevant to our topic
MicroRNA profiling reveals unique miRNA signatures in IGF-1 treated embryonic striatal stem cell fate decisions in striatal neurogenesis in vitro.	out	irrelevant to our topic
MicroRNA regulation in angiogenesis.	out	irrelevant to our topic
MicroRNA signature in wound healing following excimer laser ablation: role of miR-133b on TGFbeta1, CTGF, SMA, and COL1A1 expression levels in rabbit corneal fibroblasts.	out	irrelevant to our topic
microRNA signatures in prodromal REM sleep behavior disorder and early Parkinson's disease as noninvasive biomarkers.	out	irrelevant to our topic
MicroRNA Tough Decoy Knockdowns miR-195 and Represses Hypertrophy in Chondrocytes.	out	irrelevant to our topic
MicroRNA-125a-3p participates in odontoblastic differentiation of dental pulp stem cells by targeting Fyn	out	irrelevant to our topic
MicroRNA-126 regulates EPCs function: implications for a role of miR-126 in preeclampsia.	out	irrelevant to our topic
MicroRNA-135b inhibits odontoblast-like differentiation of human dental pulp cells by regulating Smad5 and Smad4.	out	irrelevant to our topic
MicroRNA-138 Inhibits Periodontal Progenitor Differentiation under Inflammatory Conditions.	out	irrelevant to our topic
microRNA-140: A miRNA with diverse roles in human diseases. [Review]	out	irrelevant to our topic
microRNA-146a and -155, upregulated by periodontitis and type 2 diabetes in oral fluids, are predicted to regulate SARS-CoV-2 oral receptor genes.	out	irrelevant to our topic
microRNA-146a and Hey2 form a mutual negative feedback loop to regulate the inflammatory response in chronic apical periodontitis.	in in full text
MicroRNA-146a and microRNA-155 show tissue-dependent expression in dental pulp, gingival and periodontal ligament fibroblasts in vitro.	out	irrelevant to our topic
MicroRNA-146a negatively regulates the inflammatory response to Porphyromonas gingivalis in human periodontal ligament fibroblasts via TRAF6/p38 pathway.	out	irrelevant to our topic
MicroRNA-155-3p Mediates TNF-α-Inhibited Cementoblast Differentiation.	out	irrelevant to our topic
MicroRNA-155-5p is associated with oral squamous cell carcinoma metastasis and poor prognosis.	out	irrelevant to our topic
MicroRNA-155, -185 and -193b as biomarkers in human papillomavirus positive and negative tonsillar and base of tongue squamous cell carcinoma.	out	irrelevant to our topic
MicroRNA-17/20a functions to inhibit cell migration and can be used a prognostic marker in oral squamous cell carcinoma.	out	irrelevant to our topic
MicroRNA-186 serves as a tumor suppressor in oral squamous cell carcinoma by negatively regulating the protein tyrosine phosphatase SHP2 expression.	out	irrelevant to our topic
microRNA-18a, a member of the oncogenic miR-17-92 cluster, targets Dicer and suppresses cell proliferation in bladder cancer T24 cells.	out	irrelevant to our topic
MicroRNA-195 acts as an anti-proliferative miRNA in human melanoma cells by targeting Prohibitin 1.	out	irrelevant to our topic
MicroRNA-200a Regulates the Development of Mandibular Condylar Cartilage.	out	irrelevant to our topic
MicroRNA-203 up-regulates nitric oxide expression in temporomandibular joint chondrocytes via targeting TRPV4	out	irrelevant to our topic
MicroRNA-204 regulates osteogenic induction in dental follicle cells.	out	irrelevant to our topic
microRNA-21 and microRNA-375 from oral cytology as biomarkers for oral tongue cancer detection.	out	irrelevant to our topic
microRNA-21 Contributes to Orthodontic Tooth Movement.	out	irrelevant to our topic
MICRORNA-222 AND MICRORNA-203 SIGNATURES IN ORAL SQUAMOUS CELL CARCINOMA: POTENTIAL ROLE IN PROGRESSION AND AS THERAPEUTIC TARGETS.	out	irrelevant to our topic
MicroRNA-222-3p participates in the development of oral squamous cell carcinoma by targeting CDKN1B.	out	irrelevant to our topic
MicroRNA-223 negatively regulates LPS-induced inflammatory responses by targeting NLRP3 in human dental pulp fibroblasts.	out	irrelevant to our topic
MicroRNA-24 increases hepatocellular carcinoma cell metastasis and invasion by targeting p53: miR-24 targeted p53.	out	irrelevant to our topic
MicroRNA-24 induces cisplatin resistance by targeting PTEN in human tongue squamous cell carcinoma.	out	irrelevant to our topic
MicroRNA-27b inhibits cell proliferation in oral squamous cell carcinoma by targeting FZD7 and Wnt signaling pathway.	out	irrelevant to our topic
MicroRNA-29b Promotes Subchondral Bone Loss in TMJ Osteoarthritis.	out	irrelevant to our topic
MicroRNA-29b regulates migration in oral squamous cell carcinoma and its clinical significance.	out	irrelevant to our topic
MicroRNA-31 upregulation predicts increased risk of progression of oral potentially malignant disorder.	out	irrelevant to our topic
MicroRNA-335-5p Plays Dual Roles in Periapical Lesions by Complex Regulation Pathways.	in in full text
MicroRNA-34 expression in gingival crevicular fluid correlated with orthodontic tooth movement.	out	irrelevant to our topic
MicroRNA-340 Mediates Metabolic Shift in Oral Squamous Cell Carcinoma by Targeting Glucose Transporter-1.	out	irrelevant to our topic
MicroRNA-345 functions as a tumor suppressor via targeting ZEB2 in oral squamous cell carcinoma.	out	irrelevant to our topic
MicroRNA-375 as a biomarker for malignant transformation in oral lesions.	out	irrelevant to our topic
MicroRNA-375 sensitizes tumour necrosis factor-alpha (TNF-α)-induced apoptosis in head and neck squamous cell carcinoma in vitro.	out	irrelevant to our topic
MicroRNA-383-5p regulates osteogenic differentiation of human periodontal ligament stem cells by targeting histone deacetylase 9.	out	irrelevant to our topic
MicroRNA-506 Is Involved in Regulation of the Occurrence of Lipopolysaccharides (LPS)-Induced Pulpitis by Sirtuin 1 (SIRT1).	out	irrelevant to our topic
MicroRNA-7: A miRNA with expanding roles in development and disease. [Review]	out	irrelevant to our topic
microRNA-7: a tumor suppressor miRNA with therapeutic potential. [Review]	out	irrelevant to our topic
MicroRNA-based classifiers for diagnosis of oral cavity squamous cell carcinoma in tissue and plasma.	out	irrelevant to our topic
MicroRNA-Mediated Rescue of Fear Extinction Memory by miR-144-3p in Extinction-Impaired Mice.	out	irrelevant to our topic
MicroRNA-mRNA expression profiles and functional network of submandibular gland in type 2 diabetic db/db mice.	out	irrelevant to our topic
MicroRNA-target pairs in human renal epithelial cells treated with transforming growth factor beta 1: a novel role of miR-382.	out	irrelevant to our topic
MicroRNA‐101a‐3p could be involved in the pathogenesis of temporomandibular joint osteoarthritis by mediating UBE2D1 and FZD4.	out	irrelevant to our topic
microRNA‐146a and Hey2 form a mutual negative feedback loop to regulate the inflammatory response in chronic apical periodontitis	out	irrelevant to our topic
MicroRNA‐21 promotes bone reconstruction in maxillary bone defects.	out	irrelevant to our topic
MicroRNA‐21 promotes orthodontic tooth movement by modulating the RANKL/OPG balance in T cells.	out	irrelevant to our topic
MicroRNA‐223 negatively regulates LPS‐induced inflammatory responses by targeting NLRP3 in human dental pulp fibroblasts.	out	irrelevant to our topic
MicroRNA‐3064‐3p regulates the differentiation of cementoblasts through targeting DKK1.	out	irrelevant to our topic
MicroRNA‐543 functions as an osteogenesis promoter in human periodontal ligament‐derived stem cells by inhibiting transducer of ERBB2, 2.	out	irrelevant to our topic
MicroRNA's – The vibrant performers in the oral cancer scenario.	out	irrelevant to our topic
MicroRNA155 in the growth and invasion of salivary adenoid cystic carcinoma.	out	irrelevant to our topic
MicroRNAs - Biology and clinical applications.	out	irrelevant to our topic
MicroRNAs and Periodontal Homeostasis.	out	irrelevant to our topic
MicroRNAs and Their Target Genes in Gingival Tissues.	out	irrelevant to our topic
MicroRNAs as effective surrogate biomarkers for early diagnosis of oral cancer.	out	irrelevant to our topic
MicroRNAs as prognostic molecular signatures in human head and neck squamous cell carcinoma: A systematic review and meta-analysis.	out	irrelevant to our topic
MicroRNAs contribute to the chemoresistance of cisplatin in tongue squamous cell carcinoma lines	out	irrelevant to our topic
MicroRNAs Enriched in Epithelium of Oral Squamous Cell Carcinoma in Never Smokers.	out	irrelevant to our topic
MicroRNAs in an Oral Cancer Context – from Basic Biology to Clinical Utility.	out	irrelevant to our topic
MicroRNAs in Head and Neck Cancer.	out	irrelevant to our topic
MicroRNAs in human tongue squamous cell carcinoma: From pathogenesis to therapeutic implications.	out	irrelevant to our topic
microRNAs in inflammatory alveolar bone defect: A review.	out	irrelevant to our topic
MicroRNAs in oral cancer: Biomarkers with clinical potential.	out	irrelevant to our topic
microRNAs in oral cancer: Moving from bench to bed as next generation medicine.	out	irrelevant to our topic
MicroRNAs in oral fluids (saliva and gingival crevicular fluid) as biomarkers in orthodontics: systematic review and integrated bioinformatic analysis.	out	irrelevant to our topic
MicroRNAs in oral lichen planus and potential miRNA-mRNA pathogenesis with essential cytokines: a review.	out	irrelevant to our topic
MicroRNAs Play a Critical Role in Tooth Development.	out	irrelevant to our topic
MicroRNAs: emerging players in apical periodontitis. [Review]	out	review
MicroRNAs: New actors in the oral cancer scene	out	irrelevant to our topic
MicroRNAs: New insights into the pathogenesis of endodontic periapical disease	in in full text
microRNAs: Novel Players in the Regulation of Endodontic Disease	out	irrelevant to our topic
Mineral Trioxide Aggregate-A Review of Properties and Testing Methodologies	out	irrelevant to our topic
Mineral-Doped Poly(L-lactide) Acid Scaffolds Enriched with Exosomes Improve Osteogenic Commitment of Human Adipose-Derived Mesenchymal Stem Cells	out	irrelevant to our topic
Mini but mighty: micro RNAs in the pathobiology of periodontal disease.	out	irrelevant to our topic
MiR equal than others: MicroRNA enhancement for cutaneous wound healing. [Review]	out	review
miR-1 as a tumor suppressive microRNA targeting TAGLN2 in head and neck squamous cell carcinoma.	out	irrelevant to our topic
miR-1226 detection in GCF as potential biomarker of chronic periodontitis: A pilot study.	out	irrelevant to our topic
miR-125a-5p Functions as Tumor Suppressor microRNA And Is a Marker of Locoregional Recurrence And Poor prognosis in Head And Neck Cancer.	out	irrelevant to our topic
MiR-125b, a microRNA downregulated in psoriasis, modulates keratinocyte proliferation by targeting FGFR2.	out	irrelevant to our topic
miR-1275: A single microRNA that targets the three IGF2-mRNA-binding proteins hindering tumor growth in hepatocellular carcinoma.	out	irrelevant to our topic
MiR-138-1-3p alters the stemness and radiosensitivity of tumor cells by targeting CRIPTO and the JAK2/STAT3 pathway in nasopharyngeal carcinoma	out	irrelevant to our topic
miR-140-3p enhanced the osteo/odontogenic differentiation of DPSCs via inhibiting KMT5B under hypoxia condition	out	irrelevant to our topic
miR-140-5p-mediated regulation of the proliferation and differentiation of human dental pulp stem cells occurs through the lipopolysaccharide/toll-like receptor 4 signaling pathway.	out	irrelevant to our topic
MiR-143 and miR-135 inhibitors treatment induces skeletal myogenic differentiation of human adult dental pulp stem cells.	out	irrelevant to our topic
miR-146a and miR-155 expression in PBMCs from patients with Sjögren's syndrome.	out	irrelevant to our topic
miR-146a Induces Differentiation of Periodontal Ligament Cells.	out	irrelevant to our topic
MiR-148a-3p Regulates the Invasion and Odontoblastic Differentiation of Human Dental Pulp Stem Cells via the Wnt1/β-Catenin Pathway	out	irrelevant to our topic
miR-155 gene: a typical multifunctional microRNA. [Review] [81 refs]	out	review
miR-16-5p Is a Stably-Expressed Housekeeping MicroRNA in Breast Cancer Tissues from Primary Tumors and from Metastatic Sites.	out	irrelevant to our topic
miR-181a Mediates Inflammatory Gene Expression After Intracerebral Hemorrhage: An Integrated Analysis of miRNA-seq and mRNA-seq in a Swine ICH Model.	out	irrelevant to our topic
miR-181a 抑制舌鳞癌细胞上皮-间充质转化及化疗耐药机制的研究.	out	language
MiR-182-5p and its target HOXA9 in non-small cell lung cancer: a clinical and in-silico exploration with the combination of RT-qPCR, miRNA-seq and miRNA-chip.	out	irrelevant to our topic
miR-183 and miR-21 expression as biomarkers of progression and survival in tongue carcinoma patients.	out	irrelevant to our topic
miR-18a promotes malignant progression by impairing microRNA biogenesis in nasopharyngeal carcinoma.	out	irrelevant to our topic
miR-199a, a bone morphogenic protein 2-responsive MicroRNA, regulates chondrogenesis via direct targeting to Smad1.	out	irrelevant to our topic
MiR-200a contributes to the migration of BMSCs induced by the secretions of E. faecalis via FOXJ1/NFκB/MMPs axis	out	irrelevant to our topic
MiR-200b suppresses TNF-α-induced AMTN production in human gingival epithelial cells.	out	irrelevant to our topic
miR-20b-5p functions as tumor suppressor microRNA by targeting cyclinD1 in colon cancer.	out	irrelevant to our topic
miR-21, An Oncogenic Target miRNA for Cancer Therapy: Molecular Mechanisms and Recent Advancements in Chemo and Radio-resistance. [Review]	out	review
miR-22 regulates cell invasion, migration and proliferation in vitro through inhibiting CD147 expression in tongue squamous cell carcinoma.	out	irrelevant to our topic
miR-221 and miR-222 expression increased the growth and tumorigenesis of oral carcinoma cells.	out	irrelevant to our topic
miR-221 suppression through nanoparticle-based miRNA delivery system for hepatocellular carcinoma therapy and its diagnosis as a potential biomarker.	out	irrelevant to our topic
miR-223 regulates oral squamous cell carcinoma metastasis through the Wnt/β-catenin signaling pathway.	out	irrelevant to our topic
MIR-24 EXPRESSION IN SALIVA SAMPLES FROM PATIENTS WITH ORAL MALIGNANT LESIONS.	out	irrelevant to our topic
miR-24 up-regulation in oral carcinoma: Positive association from clinical and in vitro analysis	out	vitro analysis
miR-26a enhances miRNA biogenesis by targeting Lin28B and Zcchc11 to suppress tumor growth and metastasis.	out	irrelevant to our topic
miR-27b-3p Suppressed Osteogenic Differentiation of Maxillary Sinus Membrane Stem Cells by Targeting Sp7.	out	irrelevant to our topic
miR-29b suppresses proliferation, migration, and invasion of tongue squamous cell carcinoma through PTEN–AKT signaling pathway by targeting Sp1.	out	irrelevant to our topic
MiR-302b Suppresses Tumor Metastasis by Targeting Frizzled 6 in OSCC.	out	irrelevant to our topic
miR-30a-5p inhibits osteogenesis and promotes periodontitis by targeting Runx2.	out	irrelevant to our topic
miR-34 - a microRNA replacement therapy is headed to the clinic.	out	irrelevant to our topic
MiR-361-3p/ Signaling Axis Controls Cementoblast Differentiation.	out	irrelevant to our topic
miR-3941: A novel microRNA that controls IGBP1 expression and is associated with malignant progression of lung adenocarcinoma.	out	irrelevant to our topic
miR-433 inhibits oral squamous cell carcinoma (OSCC) cell growth and metastasis by targeting HDAC6.	out	irrelevant to our topic
MiR-4484 Acts as a Potential Saliva Biomarker for Early Detection of Peri-implantitis.	out	irrelevant to our topic
miR-454 performs tumor-promoting effects in oral squamous cell carcinoma via reducing NR3C2.	out	irrelevant to our topic
MiR-455-3p, miR-150 and miR-375 are aberrantly expressed in salivary gland adenoid cystic carcinoma and polymorphous adenocarcinoma.	out	irrelevant to our topic
MiR-486-3p was downregulated at microRNA profiling of adrenals of multiple endocrine neoplasia type 1 mice, and inhibited human adrenocortical carcinoma cell lines.	out	irrelevant to our topic
miR-494 represses HOXA10 expression and inhibits cell proliferation in oral cancer.	out	irrelevant to our topic
MiR-495/IGF-1/AKT Signaling as a Novel Axis Is Involved in the Epithelial-to-Mesenchymal Transition of Oral Squamous Cell Carcinoma.	out	irrelevant to our topic
MiR-5000-3p, miR-5009-3P and miR-552: potential microRNA biomarkers of side population cells in colon cancer.	out	irrelevant to our topic
miR-514a-3p: a novel SHP-2 regulatory miRNA that modulates human cytotrophoblast proliferation.	out	irrelevant to our topic
miR-532-3p: a possible altered miRNA in cumulus cells of infertile women with advanced endometriosis.	out	irrelevant to our topic
MiR-542-3p, a microRNA targeting CDK14, suppresses cell proliferation, invasiveness, and tumorigenesis of epithelial ovarian cancer.	out	irrelevant to our topic
MiR-5571-3p and miR-135b-5p, derived from analyses of microRNA profile sequencing, correlate with increased disease risk and activity of rheumatoid arthritis.	out	irrelevant to our topic
miR-582-5p 在唾液腺腺样囊性癌侵袭、转移中的作用.	out	language
miR-584 expressed in human gingival epithelial cells is induced by Porphyromonas gingivalis stimulation and regulates interleukin-8 production via lactoferrin receptor.	out	irrelevant to our topic
miR-634 is a Pol III-dependent intronic microRNA regulating alternative-polyadenylated isoforms of its host gene PRKCA.	out	irrelevant to our topic
miR-9 is an essential oncogenic microRNA specifically overexpressed in mixed lineage leukemia-rearranged leukemia.	out	irrelevant to our topic
MiR-99a exerts anti-metastasis through inhibiting myotubularin-related protein 3 expression in oral cancer.	out	irrelevant to our topic
miR-CATCH: microRNA capture affinity technology.	out	irrelevant to our topic
miR-CLIP capture of a miRNA targetome uncovers a lincRNA H19-miR-106a interaction.	out	irrelevant to our topic
miR-EdiTar: a database of predicted A-to-I edited miRNA target sites.	out	irrelevant to our topic
miR-isomiRExp: a web-server for the analysis of expression of miRNA at the miRNA/isomiR levels.	out	irrelevant to our topic
miR-PREFeR: an accurate, fast and easy-to-use plant miRNA prediction tool using small RNA-Seq data.	out	irrelevant to our topic
miR-Sens--a retroviral dual-luciferase reporter to detect microRNA activity in primary cells.	out	irrelevant to our topic
miR‐146a‐5p attenuates IL‐1β‐induced IL‐6 and IL‐1β expression in a cementoblast‐derived cell line.	out	irrelevant to our topic
MiR‐153‐3p inhibits osteogenic differentiation of periodontal ligament stem cells through KDM6A‐induced demethylation of H3K27me3.	out	irrelevant to our topic
miR‐155 promotes macrophage pyroptosis induced by Porphyromonas gingivalis through regulating the NLRP3 inflammasome.	out	irrelevant to our topic
miR‐611 promotes the proliferation, migration and invasion of tongue squamous cell carcinoma cells by targeting FOXN3.	out	irrelevant to our topic
MiR‐646 regulates proliferation and migration of laryngeal carcinoma through the PI3K/AKT pathway via targeting GPX1.	out	irrelevant to our topic
MIR137/MIR2682 locus is associated with perineural invasiveness in head and neck cancer.	out	irrelevant to our topic
miRNA and mRNA expression profiling identifies members of the miR-200 family as potential regulators of epithelial-mesenchymal transition in pterygium.	out	irrelevant to our topic
miRNA expression profile of mucoepidermoid carcinoma.	out	irrelevant to our topic
miRNA expression profiles in myelodysplastic syndromes reveal Epstein-Barr virus miR-BART13 dysregulation.	out	irrelevant to our topic
miRNA expression profiling uncovers a role of miR-302b-3p in regulating skin fibroblasts senescence.	out	irrelevant to our topic
miRNA for the assessment of lymph node metastasis in patients with oral squamous cell carcinoma: Systematic review and metanalysis.	out	irrelevant to our topic
miRNA polymorphisms (miR-146a, miR-149, miR-196a2 and miR-499) are associated with the risk of coronary artery disease.	out	irrelevant to our topic
miRNA-101 supports the osteogenic differentiation in human dental follicle cells.	out	irrelevant to our topic
MiRNA-181a regulates Toll-like receptor agonist-induced inflammatory response in human fibroblasts	out	irrelevant to our topic
miRNA-21 deficiency impairs alveolar socket healing in mice.	out	irrelevant to our topic
miRNA-mRNA integrative analysis in primary myelofibrosis CD34+ cells: role of miR-155/JARID2 axis in abnormal megakaryopoiesis.	out	irrelevant to our topic
miRNAs as biomarkers of orofacial clefts: A systematic review.	out	irrelevant to our topic
miRNAs in liquid biopsy for oral squamous cell carcinoma diagnosis: Systematic review and meta-analysis.	out	irrelevant to our topic
MiRSNPs or MiR-polymorphisms, new players in microRNA mediated regulation of the cell: Introducing microRNA pharmacogenomics. [Review] [51 refs]	out	review
MMP9 protects against LPS-induced inflammation in osteoblasts	out	irrelevant to our topic
Model for Tooth Development in vitro	out	vitro
Modulation of Interleukin-8 Protein Expression by Micro-RNA 181 in Human Pulpal Fibroblasts	out	irrelevant to our topic
Modulation of LMP2A expression by a newly identified Epstein-Barr virus-encoded microRNA miR-BART22.	out	irrelevant to our topic
Modulation of Micro RNA Expression and Osteoblast Differentiation by Nanotopography.	out	irrelevant to our topic
Modulation of sodium channels as pharmacological tool for pain therapy—highlights and gaps	out	irrelevant to our topic
Molecular alterations in odontogenic keratocysts as potential therapeutic targets.	out	irrelevant to our topic
Molecular aspects of the pathogenesis of periodontitis.	out	irrelevant to our topic
Molecular Changes in miRNA in Irradiated Rat Kidneys: Role of miR-34a and its Vascular Targets in the Notch Pathway.	out	animal
Molecular characterization of immortalized normal and dysplastic oral cell lines.	out	irrelevant to our topic
Molecular Mechanisms Regulating Epithelial Barrier Function and Inflammatory Response	out	irrelevant to our topic
Molecular pathogenesis of triple-negative breast cancer based on microRNA expression signatures: antitumor miR-204-5p targets AP1S3.	out	irrelevant to our topic
Monocyte chemotactic protein-3: possible involvement in apical periodontitis chemotaxis.	out	irrelevant to our topic
Mouthwash with Tagetes lucida Cav. for Control of Chronic Periodontitis in Older Adults	out	irrelevant to our topic
Mucosal-associated invariant T cells and oral microbiome in persistent apical periodontitis	out	irrelevant to our topic
Multidifferentiation potential of dental-derived stem cells	out	irrelevant to our topic
Multifarious Histological Patterns in Solid Multicystic Ameloblastoma: A Rare Presentation	out	irrelevant to our topic
Music and the life and work of Isabella Andreini: Humanistic attitudes toward music, poetry, and theater during the late sixteenth and early seventeenth centuries. (Volumes I-III)	out	irrelevant to our topic
MYB promotes the growth and metastasis of salivary adenoid cystic carcinoma	out	irrelevant to our topic
MyD88 hypermethylation mediated by DNMT1 is associated with LTA-induced inflammatory response in human odontoblast-like cells	out	irrelevant to our topic
MyoD is regulated by the miR-29a-Tet1 pathway in C2C12 myoblast cells.	out	irrelevant to our topic
N-acetyl cysteine inhibits the lipopolysaccharide-induced inflammatory response in bone marrow mesenchymal stem cells by suppressing the TXNIP/NLRP3/IL-1β signaling pathway	out	irrelevant to our topic
Nano-graphene oxide with antisense walR RNA inhibits the pathogenicity of Enterococcus faecalis in periapical periodontitis	out	irrelevant to our topic
NANOmetric BIO-Banked MSC-Derived Exosome (NANOBIOME) as a Novel Approach to Regenerative Medicine	out	irrelevant to our topic
Nanotherapeutics for regeneration of degenerated tissue infected by bacteria through the multiple delivery of bioactive ions and growth factor with antibacterial/angiogenic and osteogenic/odontogenic capacity	out	irrelevant to our topic
ncRI: a manually curated database for experimentally validated non-coding RNAs in inflammation	out	irrelevant to our topic
Nell-1 attenuates lipopolysaccharide-induced inflammation in human dental pulp cells	out	irrelevant to our topic
Neurectomy of the trigeminal nerve branches: Clinical evaluation of an “obsolete” treatment	out	irrelevant to our topic
Neuropathic Pain Associated With Hansen's Disease: A Rare Case Report.	out	case report
New technologies for studying the complexity of oral diseases.	out	irrelevant to our topic
NGS-based miRNome identifies miR-449 cluster as marker of malignant transformation of sinonasal inverted papilloma.	out	irrelevant to our topic
Nicotinamide as a Foundation for Treating Neurodegenerative Disease and Metabolic Disorders	out	irrelevant to our topic
Nicotinamide: Oversight of Metabolic Dysfunction through SIRT1, mTOR, and Clock Genes	out	irrelevant to our topic
NLRP3 Inflammasome: A New Target for Prevention and Control of Osteoporosis?	out	irrelevant to our topic
NLRP6 in host defense and intestinal inflammation	out	irrelevant to our topic
NOD1-Targeted Immunonutrition Approaches: On the Way from Disease to Health	out	irrelevant to our topic
Non-invasive screening of a microRNA-based dysregulation signature in oral cancer and oral potentially malignant disorders.	out	irrelevant to our topic
Noncoding RNAs: new insights into the odontogenic differentiation of dental tissue-derived mesenchymal stem cells	out	irrelevant to our topic
NOTCH3 is expressed in human apical papilla and in subpopulations of stem cells isolated from the tissue	out	irrelevant to our topic
Novartis AG (NOVN) - Pharmaceuticals &amp; Healthcare - Deals and Alliances Profile	out	irrelevant to our topic
Nrf2 in the Field of Dentistry with Special Attention to NLRP3	out	irrelevant to our topic
Nrf2-miR-129-3p-mTOR Axis Controls an miRNA Regulatory Network Involved in HDACi-Induced Autophagy.	out	irrelevant to our topic
NSAID SULINDAC-INDUCED MICRO-RNA ALTERATIONS IN ORAL CANCER CELLS.	out	irrelevant to our topic
NUTM2A-AS1 silencing alleviates LPS-induced apoptosis and inflammation in dental pulp cells through targeting let-7c-5p/HMGB1 axis.	out	irrelevant to our topic
O39. MicroRNA expression in formalin fixed, paraffin embedded oral tissues with and without squamous cell carcinoma	out	irrelevant to our topic
Obesity, Inflammation, and Oral Infections: Are microRNAs the Missing Link?	out	irrelevant to our topic
Observational Study Evaluating Pain in Endodontic Patients Diagnosed with Depression: A Pilot Study	out	irrelevant to our topic
Odontoblastic Exosomes Attenuate Apoptosis in Neighboring Cells	out	irrelevant to our topic
ODONTOGENIC CYST - CASE REPORT AND REVIEW	out	review
On the Choice of the Extracellular Vesicles for Therapeutic Purposes	out	irrelevant to our topic
Oncogenic microRNAs as biomarkers of oral tumorigenesis and minimal residual disease.	out	irrelevant to our topic
OP002: Identification of seven miRNAs as potential biomarkers for oral lichen planus and oral squamous cell carcinoma – A pilot study.	out	irrelevant to our topic
OP005: Oral cancer and epigenetics: An in vitro study on 298 micro-RNA and future perspectives.	out	irrelevant to our topic
OP058: Development of an algorithm for oral squamous cell carcinoma risk assessment using micro-RNA markers.	out	irrelevant to our topic
OP197: MI-RNA expression profiling of HPV-positive and -negative oropharyngeal carcinomas.	out	irrelevant to our topic
Oral cancer databases: A comprehensive review.	out	review
Oral Cancer: A Historical Review	out	review
Oral Cavity as a Source of Mesenchymal Stem Cells Useful for Regenerative Medicine in Dentistry	out	irrelevant to our topic
Oral Epithelium Response of Electronic Cigarette Smoking.	out	irrelevant to our topic
Oral Lining Mucosa Development Depends on Mesenchymal microRNAs.	out	irrelevant to our topic
Oral Mesenchymal Stem/Progenitor Cells: The Immunomodulatory Masters	out	irrelevant to our topic
Oral Parafunctional Behaviours: Acute versus Chronic Painful Temporomandibular Disorders	out	irrelevant to our topic
Oral presentation of haematological disease	out	irrelevant to our topic
Oral submucous fibrosis: A global challenge. Rising incidence, risk factors, management, and research priorities.	out	irrelevant to our topic
Oral swirl samples - a robust source of microRNAprotected by extracellular vesicles.	out	irrelevant to our topic
Orofacial Granulomatosis: Clinical and Immunological Studies	out	irrelevant to our topic
Orofacial Pain and Jaw Function in Children and Adolescents : Epidemiology, Biopsychosocial Implications and Caregivers' Approach	out	irrelevant to our topic
Orthokeratinized Odontogenic Cysts Presenting as a Periapical Lesion: Report of a Case and Literature Review.	out	irrelevant to our topic
Osteoclast formation, inflammation, and matrix metalloproteinase-9 are downregulated in bone repair following root canal treatment in dogs teeth	out	irrelevant to our topic
Osteocyte apoptosis: the roles and key molecular mechanisms in resorption-related bone diseases	out	irrelevant to our topic
Osteogenic effects of microRNA-335-5p/lipidoid nanoparticles coated on titanium surface.	out	irrelevant to our topic
Osteoimmunology of Oral and Maxillofacial Diseases: Translational Applications Based on Biological Mechanisms	out	irrelevant to our topic
Osteopontin expression is an independent factor for poor survival in oral squamous cell carcinoma: a computer-assisted analysis on TMA sections.	out	irrelevant to our topic
Osteopontin in Bone Metabolism and Bone Diseases	out	irrelevant to our topic
Osteopontin in gingival crevicular fluid.	out	irrelevant to our topic
Outcome of revascularization therapy in traumatized immature incisors	out	irrelevant to our topic
Ovarian cancer cell invasiveness is associated with discordant exosomal sequestration of Let-7 miRNA and miR-200.	out	irrelevant to our topic
Overexpression of MicroRNA miR-7-5p Is a Potential Biomarker in Neuroendocrine Neoplasms of the Small Intestine.	out	irrelevant to our topic
Overexpression of TP53 mutation-associated microRNA-182 promotes tumor cell proliferation and migration in head and neck squamous cell carcinoma.	out	irrelevant to our topic
Overnight oxygen desaturation index in sickle cell disease: prediction of sleep apnea.	out	irrelevant to our topic
Oxidative Stress in Oral Diseases: Understanding Its Relation with Other Systemic Diseases	out	irrelevant to our topic
P132. MicroRNA profiles of oral squamous cell carcinoma (OSCC) using formalin-fixed, paraffin embedded (FFPE) tissue	out	irrelevant to our topic
P55. MicroRNA signature and aberrant methylation in human oral squamous cell carcinomas	out	irrelevant to our topic
Paeoniflorin protects PC12 cells from oxygen-glucose deprivation/reoxygenation-induced injury via activating JAK2/STAT3 signaling	out	irrelevant to our topic
Pannexin 3 channels in health and disease	out	irrelevant to our topic
Pannexin3 inhibits TNF‐α‐induced inflammatory response by suppressing NF‐κB signalling pathway in human dental pulp cells	out	irrelevant to our topic
Paracetamol misusing to dental pain: a case-report and recommandations for treatment	out	case report
Parallel mRNA and microRNA profiling of HEV71-infected human neuroblastoma cells reveal the up-regulation of miR-1246 in association with DLG3 repression.	out	irrelevant to our topic
Parenchymal and Stromal Tissue Regeneration of Tooth Organ by Pivotal Signals Reinstated in Decellularized Matrix	out	irrelevant to our topic
Passenger strand miRNA miR-31∗ regulates the phenotypes of oral cancer cells by targeting RhoA	out	irrelevant to our topic
Pathogenesis investigation of miR‐199‐5p in oral submucous fibrosis based on bioinformatics analysis.	out	irrelevant to our topic
Pathological and Therapeutic Approach to Endotoxin-Secreting Bacteria Involved in Periodontal Disease	out	irrelevant to our topic
Pathophysiological mechanisms of root resorption after dental trauma: a systematic scoping review	out	review
PECAM1 Combines With CXCR4 to Trigger Inflammatory Cell Infiltration and Pulpitis Progression Through Activating the NF-κB Signaling Pathway	out	irrelevant to our topic
Peptide-15 Changes miRNA Expression in Osteoblast-Like Cells.	out	irrelevant to our topic
Periodontal Diseases and Conditions - Periodontitis; Report Summarizes Periodontitis Study Findings from Sichuan University (Expression Profiles of Inflammation-associated microRNAs in Periapical Lesions and Human Periodontal Ligament Fibroblasts Inflammation)	out	irrelevant to our topic
Periodontal Diseases and Conditions; New Periodontitis Findings from Federal University Described (Diagnostic Accuracy of Cone-beam Computed Tomography and Conventional Radiography on Apical Periodontitis : A Systematic Review and Meta-analysis)	out	irrelevant to our topic
Periodontal Inflammation and Systemic Diseases: An Overview	out	irrelevant to our topic
Periodontal inflammation recruits distant metastatic breast cancer cells by increasing myeloid-derived suppressor cells	out	irrelevant to our topic
Periodontitis may modulate long-non coding RNA expression.	out	irrelevant to our topic
Periodontitis‐compromised dental pulp stem cells secrete extracellular vesicles carrying miRNA‐378a promote local angiogenesis by targeting Sufu to activate the Hedgehog/Gli1 signalling	out	irrelevant to our topic
Periodontitis, pathogenesis and progression: miRNA-mediated cellular responses to Porphyromonas gingivalis.	out	irrelevant to our topic
PerioGlas® Regulates Osteoblast RNA Interfering.	out	irrelevant to our topic
Persistent Infection of Simian Foamy Virus Derived from the Japanese Macaque Leads to the High-Level Expression of microRNA that Resembles the miR-1 microRNA Precursor Family.	out	irrelevant to our topic
Perspective: obesity, inflammation, and oral infections: are microRNAs the missing link?	out	irrelevant to our topic
Photosensitizers attenuate LPS-induced inflammation: implications in dentistry and general health	out	irrelevant to our topic
Physical and chemical behaviour of endodontic sealers and cements	out	irrelevant to our topic
Physical and Mechanical Properties of Composite Restorative Systems	out	irrelevant to our topic
Physical, chemical and biological characterizations of urethane dimethacrylate biomaterial composite	out	irrelevant to our topic
Physicochemical Factors of Dentine Adhesive Resins	out	irrelevant to our topic
PiggyBac transposon-mediated gene delivery efficiently generates stable transfectants derived from cultured primary human deciduous tooth dental pulp cells (HDDPCs) and HDDPC-derived iPS cells	out	irrelevant to our topic
Pilot GWAS of caries in African-Americans shows genetic heterogeneity	out	irrelevant to our topic
Plant-derived polyphenols regulate expression of miRNA paralogs miR-103/107 and miR-122 and prevent diet-induced fatty liver disease in hyperlipidemic mice.	out	irrelevant to our topic
Plasma Levels of microRNA-221 (miR-221) are Increased in Patients with Acute Pulmonary Embolism.	out	irrelevant to our topic
Plasma microRNA miR-26b as a potential diagnostic biomarker of degenerative myelopathy in Pembroke welsh corgis.	out	irrelevant to our topic
Plasma miR-187* is a potential biomarker for oral carcinoma.	out	irrelevant to our topic
Plasma Rich in Growth Factors in the Treatment of Endodontic Periapical Lesions in Adult Patients: A Narrative Review	out	review
Platelet-Therapeutics to Improve Tissue Regeneration and Wound Healing—Physiological Background and Methods of Preparation	out	irrelevant to our topic
Platform technologies for regenerative endodontics from multifunctional biomaterials to tooth-on-a-chip strategies	out	irrelevant to our topic
PLGA submicron particles containing chlorhexidine, calcium and phosphorus inhibit Enterococcus faecalis infection and improve the microhardness of dentin	out	irrlevant
pol-miR-731, a teleost miRNA upregulated by megalocytivirus, negatively regulates virus-induced type I interferon response, apoptosis, and cell cycle arrest.	out	irrlevant
Portrait of a CAF: The story of cancer-associated fibroblasts in head and neck cancer.	out	irrlevant
Poster 09: The Down-Regulated MicroRNA in Oral Squamous Cell Carcinoma Acts as a Tumor Suppressor	out	irrlevant
Poster abstracts of the 6th biennial meeting of the European Federation of Conservative Dentistry (EFCD) held in association with the 33th national congress of the College National des Enseignants en Odontologie Conservatrice (CNEOC), France, 9-11 May 2013, Paris, France	out	irrlevant poster
Poster Presentations	out	poster
Posters	out	poster
Potential Application of Human β-Defensin 4 in Dental Pulp Repair	out	irrlevant
Potential application of tumor suppressor microRNAs for targeted therapy in head and neck cancer: A mini-review.	out	irrelevant review
Potential biomarkers of abnormal osseointegration of implants in type II diabetes mellitus.	out	irrlevant
Potential Novel Strategies for the Treatment of Dental Pulp-Derived Pain: Pharmacological Approaches and Beyond	out	irrlevant
Potential of Bone-Marrow-Derived Mesenchymal Stem Cells for Maxillofacial and Periodontal Regeneration: A Narrative Review	out	irrelevant review
Potential role of TP63 in apical periodontitis development.	out	irrlevant
Potential roles of miR‐335‐5p on pathogenesis of experimental periodontitis.	out	irrlevant
PP013: The association between genetic polymorphism and the processing efficiency of miR-149 affects the prognosis of patients with head and neck squamous cell carcinoma.	out	irrlevant
PP033: Concordance of pathologic examination and qRT-PCR for microRNA expression in lymph nodes from oral squamous cell carcinoma patients.	out	irrlevant
PP083: Oncogenic microRNA-31 as prognostic potential biomarker in histologically negative surgical margins of head and neck cancer patients.	out	irrlevant
PP084: MicroRNA and cancer of the tongue.	out	irrlevant
PP085: Study of microRNAs’ expression profile in head and neck cancer.	out	irrlevant
PP088. The role of microRNA in pathogenesis of preeclampsia-miRNA network analysis.	out	irrlevant
PredAmyl-MLP: Prediction of Amyloid Proteins Using Multilayer Perceptron	out	irrlevant
Predicting the Key Genes Involved in Aortic Valve Calcification Through Integrated Bioinformatics Analysis	out	irrlevant
Predictive Prognostic Value of Tissue-Based MicroRNA Expression in Oral Squamous Cell Carcinoma: A Systematic Review and Meta-analysis.	out	irrlevant
Preeclampsia up-regulates angiogenesis-associated microRNA (i.e., miR-17, -20a, and -20b) that target ephrin-B2 and EPHB4 in human placenta.	out	irrlevant
Preparation of PLGA-chitosan based nanocarriers for enhancing antibacterial effect of ciprofloxacin in root canal infection	out	irrlevant
Presence of langerhans cells, regulatory T cells (Treg) and mast cells in asymptomatic apical periodontitis.	out	irrlevant
Prevalence & Impact of Maxillary Sinus Incidental Findings in Cone-Beam Computerized Tomography a Systematic Review	out	irrlevant
Prevalence of ciliated epithelium in apical periodontitis lesions.	out	irrlevant
Prevalence of Non-vital Molars and Incisors in Children- A Retrospective Study	out	irrlevant
Prevalence of Stomatitis in Anaemic Patients- An Institution Based Retrospective Study	out	irrlevant
Prevalence of technical errors and periapical lesions in a sample of endodontically treated teeth: a CBCT analysis	out	irrlevant
Primary molar pulpotomy: A systematic review and network meta-analysis	out	irrlevant
Priming strategies for controlling stem cell fate: Applications and challenges in dental tissue regeneration	out	irrlevant
Pro-Inflammatory Cytokine TNF-α Attenuates BMP9-Induced Osteo/ Odontoblastic Differentiation of the Stem Cells of Dental Apical Papilla (SCAPs)	out	irrlevant
PROBLEMS IN AMINO ACID RACEMIZATION DATING ANALYSES: BONES AND TEETH FROM THE ARCHEOLOGICAL SITES LACHAISE AND MONTGAUDIER (CHARENTE, FRANCE)	out	irrlevant
Prognostic value of the MicroRNA regulators Dicer and Drosha in non-small-cell lung cancer: co-expression of Drosha and miR-126 predicts poor survival.	out	irrlevant
Programming the Gut Microbiota-Bone Axis by Early Life Exposure to Vitamin D in Mice in the Context of an Obesogenic Diet	out	irrlevant
Promising Scaffold-Free Approaches in Translational Dentistry	out	irrlevant
Promotive effects of HOXA10 antisense RNA on the stemness of oral squamous cell carcinoma stem cells through a microRNA-29a/MCL-1/phosphatidyl inositol 3-kinase/protein kinase B axis.	out	irrlevant
Propofol Ameliorates the Proliferation and Epithelial-Mesenchymal Transition of Hepatoma Carcinoma Cells via Non-Coding RNA Activated by DNA Damage (NORAD)/microRNA (miR)-556-3p/Migration and Invasion Enhancer 1 (MIEN1) Axis.	out	irrlevant
Propolis Affects Pseudomonas aeruginosa Growth, Biofilm Formation, eDNA Release and Phenazine Production: Potential Involvement of Polyphenols	out	irrlevant
Protective Effect of TNFRSF11A rs7239667 G > C Gene Polymorphism on Coronary Outcome of Kawasaki Disease in Southern Chinese Population	out	irrlevant
Protective Effects of Lentinan Against Lipopolysaccharide-Induced Mastitis in Mice	out	irrlevant
Protein 53, B-Cell Lymphoma-2, Cyclooxygenase-2, and CD105 Reactivity in Keratocystic Odontogenic Tumors: An Immunohistochemical Analysis	out	irrlevant
Proteomic analysis of human dental pulp in different clinical diagnosis	out	irrlevant
Prothrombotic effects of high uric acid in mice via activation of MEF2C-dependent NF-κB pathway by upregulating let-7c	out	irrlevant
PTEN and miR-26b: Promising prognostic biomarkers in initiation and progression of Oral Squamous Cell Carcinoma.	out	irrlevant
Puerarin improves graft bone defect through microRNA-155-3p-mediated p53/TNF-α/STAT1 signaling pathway	out	irrlevant
Pulp stem cells derived from human permanent and deciduous teeth: Biological characteristics and therapeutic applications	out	irrlevant
Pulp Testing: A Literature Review	out	irrlevant
Pulp-dentin Regeneration	out	irrlevant
PVT1 Long Non-coding RNA in Gastrointestinal Cancer	out	irrlevant
Pyroptosis-Mediated Periodontal Disease	out	irrlevant
Quality of root canal fillings and prevalence of apical radiolucencies in a German population: a CBCT analysis	out	irrlevant
Radiographic examination of apical extrusion of root canal irrigants during cavitation induced by Er,Cr:YSGG laser irradiation: an in vivo study	out	irrlevant
Radiologic assessment of quality of root canal fillings and periapical status in an Austrian subpopulation – An observational study	in in full text
RALBP1 regulates oral cancer cells via Akt and is a novel target of miR-148a-3p and miR-148b-3p.	out	irrlevant
Recent Advances In Dental Science - A Brief Review	out	irrlevant
Reciprocal Interactions of Mitochondria and the Neuroimmunoendocrine System in Neurodegenerative Disorders: An Important Role for Melatonin Regulation	out	irrlevant
Regulation of Gene Expression by FC Receptor Cross-Linking in Primary Human Macrophages	out	irrlevant
Regulation of Inflammation by Lipid Mediators in Oral Diseases	out	irrlevant
Regulation of Inflammatory Genes Involved in Periodontal Diseases by DNA Methylation	out	irrlevant
Regulation of matrix metalloproteinase-3 gene expression in inflammation: A molecular study	out	irrlevant
Regulation of several androgen-induced genes through the repression of the miR-99a/let-7c/miR-125b-2 miRNA cluster in prostate cancer cells.	out	irrlevant
Regulation of transient receptor potential vanilloid 1 expression in trigeminal ganglion neurons via methyl-CpG binding protein 2 signaling contributes tongue heat sensitivity and inflammatory hyperalgesia in mice	out	irrlevant
Regulation of UHRF1 by dual-strand tumor-suppressor microRNA-145 (miR-145-5p and miR-145-3p): Inhibition of bladder cancer cell aggressiveness.	out	irrlevant
Regulatory Effects of microRNA-92 (miR-92) on VHL Gene Expression and the Hypoxic Activation of miR-210 in Clear Cell Renal Cell Carcinoma.	out	irrlevant
Regulatory interactions between long noncoding RNA LINC00968 and miR-9-3p in non-small cell lung cancer: A bioinformatic analysis based on miRNA microarray, GEO and TCGA.	out	irrlevant
Regulatory mechanisms of branching morphogenesis in mouse submandibular gland rudiments.	out	irrlevant
Regulatory roles of microRNAs in human dental tissues	out	irrlevant
Relation between Apical Seal and Apical Preparation Diameter: An In Vitro Study	out	irrlevant
Relationship between micro RNA expression levels and histopathological features of dysplasia in oral leukoplakia.	out	irrlevant
Relationship between miRNA regulating epithelial-mesenchymal transition and chemotherapy drug-resistance in oral cancer.	out	irrlevant
Relationship between TNF-α, MMP-8, and MMP-9 levels in gingival crevicular fluid and the subgingival microbiota in periodontal disease.	out	irrlevant
Repeated stimulation by LPS promotes the senescence of DPSCs via TLR4/MyD88-NF-κB-p53/p21 signaling	out	irrlevant
Reports of Societies98	out	irrlevant
Reproducibilidad en el diagnóstico imagenológico de periodontitis apical a partir de CBCT	out	irrlevant
Research advance in the role of exosomes on tumor progression.	out	irrlevant
Response to "The problems in evaluation of sleep disordered breathing in adults with sickle cell disease".	out	irrlevant
Restorative complications of orthodontic treatment	out	irrlevant
Restorative dentistry for the older patient cohort	out	irrlevant
Resveratrol Suppresses Matrix Metalloproteinase-2 Activation Induced by Lipopolysaccharide in Mouse Osteoblasts via Interactions with AMP-Activated Protein Kinase and Suppressor of Cytokine Signaling 1	out	irrlevant
Retrospective analysis of nonendodontic periapical lesions misdiagnosed as endodontic apical periodontitis lesions in a population of Taiwanese patients.	out	irrlevant
Revealing genome-wide mRNA and microRNA expression patterns in leukemic cells highlighted "hsa-miR-2278" as a tumor suppressor for regain of chemotherapeutic imatinib response due to targeting STAT5A.	out	irrlevant
Review of MicroRNA Deregulation in Oral Cancer. Part I.	out	irrlevant
Review of MicroRNA Proposed Target Genes in Oral Cancer. Part II.	out	irrlevant
Rewired functional regulatory networks among miRNA isoforms (isomiRs) from let-7 and miR-10 gene families in cancer.	out	irrlevant
Risk factors for wound infection after oral cancer surgery	out	irrlevant
RNA regulators of host immunity and pathogen adaptive responses in the oral cavity	out	irrlevant
RNA-binding protein GLD-1/quaking genetically interacts with the mir-35 and the let-7 miRNA pathways in Caenorhabditis elegans.	out	irrlevant
RNA-sequence-based microRNA expression signature in breast cancer: tumor-suppressive miR-101-5p regulates molecular pathogenesis.	out	irrlevant
RNA-Sequencing Based microRNA Expression Signature of Colorectal Cancer: The Impact of Oncogenic Targets Regulated by miR-490-3p.	out	irrlevant
Role of ascorbic acid in the regulation of epigenetic processes induced by Porphyromonas gingivalisin endothelial-committed oral stem cells	out	irrlevant
Role of Ku70 in the apoptosis of inflamed dental pulp stem cells	out	irrlevant
Role of Lipopolysaccharide, Derived from Various Bacterial Species, in Pulpitis—A Systematic Review	out	irrlevant
Role of MicroRNA Profiling in Oral Submucous Fibrosis Pathogenesis and Anticarcinogenic Action of Curcumin in MicroRNA Dysregulation in Oral Carcinogenesis: A Literature Update.	out	irrlevant
Role of MiR-424 on Angiogenic Potential in Human Dental Pulp Cells.	out	irrlevant
Role of miRNA in cancer diagnosis, prognosis, therapy and regulation of its expression by Epstein-Barr virus and human papillomaviruses: With special reference to oral cancer.	out	irrlevant
Role of non‐coding RNAs in head and neck squamous cell carcinoma: A narrative review.	out	irrlevant
Role of novel quorum sensing molecules (DKPs-Diketopiperazines) as activators of bacterial virulence and host response	out	irrlevant
Role of Resolvins in the Inflammatory Resolution of Neurological Diseases	out	irrlevant
Role of SULF1 in the Regulation of Metastatic Prostate Cancer Progression	out	irrlevant
Role of the JAK-STAT Pathway in Bovine Mastitis and Milk Production	out	irrlevant
Role of the MIR146A polymorphism in the origin and progression of oral squamous cell carcinoma.	out	irrlevant
Roles of follicle stimulating hormone and its receptor in human metabolic diseases and cancer	out	irrlevant
Root-like enamel pearl: a case report	out	irrlevant
RP11-874J12.4 promotes oral squamous cell carcinoma tumorigenesis via the miR-19a-5p/EBF1 axis.	out	irrlevant
S45. MicroRNA detection and variability in oral malignant and potentially malignant lesions	out	irrlevant
Saliva a sample matrix for systemic disease diagnostics.	out	irrlevant
Saliva proteomic patterns in patients with molar incisor hypomineralization	out	irrlevant
Saliva—Friend and Foe in the COVID-19 Outbreak	out	irrlevant
Salivaomics: The current scenario.	out	irrlevant
Salivary exosomal microRNAs as biomarkers for head and neck cancer detection—a literature review.	out	irrlevant
Salivary micro RNAs in oral cancer.	out	irrlevant
SALIVARY MICRORNA 155, 146a/b, AND 203: POTENTIAL NONINVASIVE DIAGNOSTIC BIOMARKERS OF PERIODONTITIS AND DIABETES.	out	irrlevant
SALIVARY MICRORNA CONCENTRATIONS MAY IDENTIFY PROLONGED CONCUSSION SYMPTOMS, STUDY FINDS.	out	irrlevant
Salivary microRNA miR-let-7a-5p and miR-3928 could be used as potential diagnostic bio-markers for head and neck squamous cell carcinoma.	out	irrlevant
Salivary miRNA in oral squamous cell carcinoma.	out	irrlevant
Salivary Small Extracellular Vesicles Associated miRNAs in Periodontal Status—A Pilot Study	out	irrlevant
SCAPs Regulate Differentiation of DFSCs During Tooth Root Development in Swine	out	irrlevant
Scientists Discover Another RNA in Saliva.	out	irrlevant
Screening of differentially expressed miRNAs during osteogenic/odontogenic differentiation of human dental pulp stem cells exposed to mechanical stress	out	irrlevant
Secretable Small RNAs via Outer Membrane Vesicles in Periodontal Pathogens.	out	irrlevant
Selected abstracts for 5th Turkish-Greek Rheumatology Congress, October 14-16, Belek, Antalya	out	irrlevant abstract for conferance
Selective cyclooxygenase-2 inhibition prevents alveolar bone loss in experimental periodontitis in rats.	out	irrlevant animal
Selective microRNA suppression in human thoracic aneurysms: relationship of miR-29a to aortic size and proteolytic induction.	out	irrlevant
Senescence in Mesenchymal Stem Cells: Functional Alterations, Molecular Mechanisms, and Rejuvenation Strategies	out	irrlevant
Sequential analysis applied to clinical trials in dentistry: a systematic review	out	irrlevant
Serum micro RNAs as potential biomarkers of mandibular prognathism.	out	irrlevant
Serum microRNA characterization identifies miR-885-5p as a potential marker for detecting liver pathologies.	out	irrlevant
Serum microRNAs and chronic periodontitis: A case-control study.	out	irrlevant
Serum-based microRNA biomarkers for major depression: MiR-16, miR-135a, and miR-1202.	out	irrlevant
Sex Hormones and Inflammation Role in Oral Cancer Progression: A Molecular and Biological Point of View	out	irrlevant
Sex-based Differential Regulation of Bacterial-induced Bone Resorption	out	irrlevant
Shared genetic and epigenetic mechanisms between chronic periodontitis and oral squamous cell carcinoma.	out	irrlevant
Shared Molecular Mechanisms between Alzheimer’s Disease and Periodontitis Revealed by Transcriptomic Analysis	out	irrlevant
SHED aggregate exosomes shuttled miR‐26a promote angiogenesis in pulp regeneration via TGF‐β/SMAD2/3 signalling	out	irrlevant
Short-period Effects of Zirconia and Titanium on Osteoblast MicroRNAs.	out	irrlevant
Short-Term Pain Evolution and Treatment Success of Pulpotomy as Irreversible Pulpitis Permanent Treatment: A Non-Randomized Clinical Study	out	irrlevant
Should the orthodontic brackets always be removed prior to magnetic resonance imaging (MRI)?	out	irrlevant
Simvastatin inhibits inflammatory response in lipopolysaccharide (LPS)-stimulated RAW264.7 macrophages through the microRNA-22/Cyr61 axis	out	irrlevant
Simvastatin&#xa0;treatment promotes proliferation of human dental pulp stem cells via modulating PI3K/AKT/miR‐9/KLF5 signalling pathway	out	irrlevant
Single nucleotide polymorphism rs4284505 in microRNA17 and risk of dental fluorosis.	out	irrlevant
Single-Cell Microchips for Profiling Macrophage Activation Dynamics	out	irrlevant
Sinking Our Teeth in Getting Dental Stem Cells to Clinics for Bone Regeneration	out	irrlevant
siRNA, miRNA, and shRNA: in vivo Applications.	out	irrlevant
SIRT1 Promotes Osteogenic Differentiation in Human Dental Pulp Stem Cells through Counteracting the Activation of STAT3	out	irrlevant
Site specificity and expression profile of miR-21 in oral squamous cell carcinoma.	out	irrlevant
Small Molecule Inhibition of MicroRNA miR-21 Rescues Chemosensitivity of Renal-Cell Carcinoma to Topotecan.	out	irrlevant
Snail and Slug collaborate on EMT and tumor metastasis through miR-101-mediated EZH2 axis in oral tongue squamous cell carcinoma	out	irrlevant
SNHG1 promotes malignant biological behaviors of glioma cells via microRNA-154-5p/miR-376b-3p- FOXP2- KDM5B participating positive feedback loop.	out	irrlevant
SNHG12/miR‐326/E2F1 feedback loop facilitates the progression of oral squamous cell carcinoma.	out	irrlevant
SNHG15 facilitated malignant behaviors of oral squamous cell carcinoma through targeting miR-188-5p/DAAM1.	out	irrlevant
SNHG3/miR‐2682‐5p/HOXB8 promotes cell proliferation and migration in oral squamous cell carcinoma.	out	irrlevant
Soluble CD14 Enhances the Response of Periodontal Ligament Stem Cells to P. gingivalis Lipopolysaccharide	out	irrlevant
Spatial and temporal distribution of Ki-67 proliferation marker, Bcl-2 and Bax proteins in the developing human tooth	out	irrlevant
Spatial-Temporal Patterns and Inflammatory Factors of Bone Matrix Remodeling	out	irrlevant
Spatiotemporal microRNA profile in peripheral nerve regeneration: miR-138 targets vimentin and inhibits Schwann cell migration and proliferation.	out	irrlevant
Special AT‐rich sequence‐binding protein 2 (Satb2) synergizes with Bmp9 and is essential for osteo/odontogenic differentiation of mouse incisor mesenchymal stem cells	out	irrlevant
Species richness of gram-positive coccoid morphotypes isolated from untreated and treated root canals of teeth associated with periapical disease	out	irrlevant
Spontaneous periodontitis is associated with metabolic syndrome in rhesus monkeys.	out	irrlevant
SPR 2013	out	irrlevant
Stem cell therapy for periodontal disease: new progress of microenvironment cognition	out	irrlevant
Stem cell-based bone and dental regeneration: a view of microenvironmental modulation	out	irrlevant
Stem Cells and Their Derivatives—Implications for Alveolar Bone Regeneration: A Comprehensive Review	out	irrlevant
Stem Cells from the Apical Papilla: A Promising Source for Stem Cell-Based Therapy	out	irrlevant
Stem Cells of Dental Origin: Current Research Trends and Key Milestones towards Clinical Application	out	irrlevant
Strategic Development of Novel Approaches to the Oral Health of Astronauts in Long-term Microgravity	out	irrlevant
Stressors alter intercellular communication and exosome profile of nasopharyngeal carcinoma cells.	out	irrlevant
Strontium Ranelate Elevates Expression of Heme Oxygenase-1 and Decreases Alveolar Bone Loss in Rats.	out	irrlevant animal
Student Poster Abstracts	out	irrlevant poster
Studies into the microbial spectrum of apical periodontitis.	out	irrlevant
Studies of nanosecond pulsed power for modifications of biomaterials and nanomaterials (SWCNT)	out	irrlevant
Study of the direct bactericidal effect of Nd:YAG and diode laser parameters used in endodontics on pigmented and nonpigmented bacteria	out	irrlevant
Suberoylanilide hydroxamic acid inhibits growth of head and neck cancer cell lines by reactivation of tumor suppressor microRNAs.	out	irrlevant
Subgingival microbiome of deep and shallow periodontal sites in patients with rheumatoid arthritis: a pilot study	out	irrlevant
Successful Nonsurgical Management of Periapical Lesions of Endodontic Origin: A Conservative Orthograde Approach	out	irrlevant
Suitable internal control microRNA genes for measuring miRNA abundance in pig milk during different lactation periods.	out	irrlevant
Supplement. 8 VII Congress - XXV Annual Scientific Meeting, Rosario Biology Society. ROSARIO - ARGENTINA	out	irrlevant
Suppression of MicroRNA-7 (miR-7) Biogenesis by Nuclear Factor 90-Nuclear Factor 45 Complex (NF90-NF45) Controls Cell Proliferation in Hepatocellular Carcinoma.	out	irrlevant
Survey of Recommended Referral Patterns for Incidental Maxillary Sinus and Airway Findings on CBCT Analysis in an Orthodontic Population	out	irrlevant
Süt Dişi Pulpa Amputasyonlarında Uygulanan Farklı Yöntemlerin Klinik ve Radyolojik Olarak Karşılaştırılması	out	language
SV40 microRNA miR-S1-3p Downregulates the Expression of T Antigens to Control Viral DNA Replication, and TNFalpha and IL-17F Expression.	out	irrlevant
Synthesis of nano zirconium oxide and its application in dentistry	out	irrlevant
Systematic Control of Aged Skeletal Muscle Following High-Intensity Stretch-Shortening Contraction Exercise Training: Epigenomic Regulation and Signaling Factors Underpinning Adaptation	out	irrlevant
Table of Contents	out	irrlevant
Targeted deletion of miR-182, an abundant retinal microRNA.	out	irrlevant
Targeting Aldose Reductase for the Treatment of Cancer	out	irrlevant
Targeting the core of neurodegeneration: FoxO, mTOR, and SIRT1	out	irrlevant
Temperature rise during photo-activated disinfection of root canals	out	irrlevant
Temporal Use of Koster Mounds: Functional Morphology, Mortuary Practices, and Paleopathology in the Prehistoric Lower Illinois River Valley	out	irrlevant
TGF-β1信号通路相关的microRNA在唾液腺腺样囊性癌侵袭转移中的作用.	out	language
TGF‐β1 induces amoeboid‐to‐mesenchymal transition of CD44high oral squamous cell carcinoma cells via miR‐422a downregulation through ERK activation and Cofilin‐1 phosphorylation.	out	irrlevant
The "melanoma-enriched" microRNA miR-4731-5p acts as a tumour suppressor.	out	irrlevant
The 11th International Symposium on VIP, PACAP and Related Peptides 27-31 August 2013 PÉCS, HUNGARY: MN	out	irrlevant
The 45th Annual Meeting on September 6th - 8th 2012, Krakow, Poland	out	irrlevant
The assessment of the robustness of microRNAs from oral cytological scrapings.	out	irrlevant
The association between miR-499a polymorphism and oral squamous cell carcinoma progression.	out	irrlevant
The Bigger Picture: Why Oral Mucosa Heals Better Than Skin	out	irrlevant
The biology and functional importance of MAIT cells	out	irrlevant
The Circular RNA Landscape of Periodontal Ligament Stem Cells During Osteogenesis.	out	irrlevant
The dual functional role of MicroRNA-18a (miR-18a) in cancer development. [Review]	out	irrlevant
The effect of cone beam computed tomography (CBCT) imaging on orthodontic diagnosis and treatment planning	out	irrlevant
The Effect of Different Vasoconstrictors and Local Anesthetic Solutions on Substance P Expression in Human Dental Pulp	out	irrlevant
The effect of green tea as an adjunct to scaling and root planing in non-surgical periodontitis therapy: a systematic review	out	irrlevant
The Effect of Low Level Laser Therapy on Direct Pulp Capping in Dogs	out	irrlevant
The Effect of Octamer-binding Transcription Factor 4B1 on microRNA Signals in Human Dental Pulp Cells with Inflammatory Response	in in full text
The Effect of Photobiomodulation on the Depth of Anesthesia During Endodontic Treatment of Teeth With Symptomatic Irreversible Pulpitis (Double Blind Randomized Clinical Trial)	out	irrlevant
The effect of wire alloy on torque expression in metallic self-ligating orthodontic brackets	out	irrlevant
The Effects of Mesenchymal Stem Cell on Colorectal Cancer	out	irrlevant
The effects of statins on dental and oral health: a review of preclinical and clinical studies	out	irrlevant
The Effects of Vascular Endothelial Growth Factor on the Characteristics of Pluripotent Dental Pulp Stem Cells	out	irrlevant
The evolutionary conserved microrna MIR-137 regulates gene expression and diurnal rhythm of the wake-promoting hypocretin neuropeptides.	out	irrlevant
The expression and clinical significance of miR-1226 in patients with periodontitis.	out	irrlevant
The expression levels of MicroRNA-146a, RANKL and OPG after non-surgical periodontal treatment.	out	irrlevant
The expression of miRNA‐146a‐5p and its mechanism of treating dry eye syndrome	out	irrlevant
The Expression of Semaphorin 7A in Human Periapical Lesions.	out	irrlevant
The fine tuning role of microRNA-RNA interaction in odontoblast differentiation and disease.	out	irrlevant
The Genetic and Epigenetic Mechanisms Involved in Irreversible Pulp Neural Inflammation	in in full text
The Gingiva from the Tissue Surrounding the Bone to the Tissue Regenerating the Bone: A Systematic Review of the Osteogenic Capacity of Gingival Mesenchymal Stem Cells in Preclinical Studies	out	irrlevant
The HIV-1 capsid-binding host factor CPSF6 is post-transcriptionally regulated by the cellular microRNA miR-125b.	out	irrlevant
The hypoxia-related microRNA miR-199a-3p displays tumor suppressor functions in ovarian carcinoma.	out	irrlevant
The immune-related microRNA miR-146b is upregulated in glioblastoma recurrence.	out	irrlevant
The impact of tiny organisms: Microbial communities and disease states	out	irrlevant
The increase of oncogenic miRNA expression in tongue carcinogenesis of a mouse model.	out	irrlevant
The influence of apical extent of root canal obturation on endodontic therapy outcome: a systematic review	out	irrlevant
THE LIFE AND WORK OF THE CHURCHES OF AN INTERSTITIAL AREA.	out	irrlevant
The long non‐coding RNA LOC285758 promotes invasion of acute myeloid leukemia cells by down‐regulating miR‐204‐5p	out	irrlevant
The metastasis-associated microRNA miR-516a-3p is a novel therapeutic target for inhibiting peritoneal dissemination of human scirrhous gastric cancer.	out	irrlevant
The microRNA expression signature of bladder cancer by deep sequencing: the functional significance of the miR-195/497 cluster.	out	irrlevant
The microRNA expression signature of small cell lung cancer: tumor suppressors of miR-27a-5p and miR-34b-3p and their targeted oncogenes.	out	irrlevant
The MicroRNA Family Both in Normal Development and in Different Diseases: The miR-17-92 Cluster. [Review]	out	irrlevant
The microRNA miR-124 controls gene expression in the sensory nervous system of Caenorhabditis elegans.	out	irrlevant
The microRNA miR-134-5p induces calcium deposition by inhibiting histone deacetylase 5 in vascular smooth muscle cells.	out	irrlevant
The microRNA miR-139 suppresses metastasis and progression of hepatocellular carcinoma by down-regulating Rho-kinase 2.	out	irrlevant
The microRNA miR-235 couples blast-cell quiescence to the nutritional state.	out	irrlevant
The microRNA miR-3174 Suppresses the Expression of ADAM15 and Inhibits the Proliferation of Patient-Derived Bladder Cancer Cells.	out	irrlevant
The miR-1206 microRNA variant is associated with methotrexate-induced oral mucositis in pediatric acute lymphoblastic leukemia.	out	irrlevant
The miR-15/107 group of microRNA genes: evolutionary biology, cellular functions, and roles in human diseases. [Review] [191 refs]	out	irrlevant
The miR-17~92 microRNA Cluster Is a Global Regulator of Tumor Metabolism.	out	irrlevant
The miR-200 and miR-221/222 microRNA families: opposing effects on epithelial identity. [Review]	out	irrlevant
The miR-217 microRNA functions as a potential tumor suppressor in pancreatic ductal adenocarcinoma by targeting KRAS.	out	irrlevant
The mir-84 and let-7 paralogous microRNA genes of Caenorhabditis elegans direct the cessation of molting via the conserved nuclear hormone receptors NHR-23 and NHR-25.	out	irrlevant
The miR-9b microRNA mediates dimorphism and development of wing in aphids.	out	irrlevant
The miR‐155‐5p inhibits osteoclast differentiation through targeting CXCR2 in orthodontic root resorption.	out	irrlevant
The miR‐3940‐5p inhibits cell proliferation of gingival mesenchymal stem cells.	out	irrlevant
The Modulatory Role of Trigeminal Sensory Innervation in Apical Periodontitis	out	irrlevant
The Old Saxon Leipzig “Heliand” manuscript fragment (MS L): New evidence concerning Luther, the poet, and Ottonian heritage	out	irrlevant
The Oncogenic Kaposi's Sarcoma-Associated Herpesvirus Encodes a Mimic of the Tumor-Suppressive miR-15/16 miRNA Family.	out	irrlevant
The oncomir face of microRNA-206: A permanent miR-206 transfection study.	out	irrlevant
The oral microbiota - a mechanistic role for systemic diseases	out	irrlevant
The oralome and its dysbiosis: New insights into oral microbiome-host interactions	out	irrlevant
The Pathogenic Effects of Fusobacterium nucleatum on the Proliferation, Osteogenic Differentiation, and Transcriptome of Osteoblasts	out	irrlevant
The Pharmacological Activity, Biochemical Properties, and Pharmacokinetics of the Major Natural Polyphenolic Flavonoid: Quercetin	out	irrlevant
The proangiogenic effects of extracellular vesicles secreted by dental pulp stem cells derived from periodontally compromised teeth	out	irrlevant
The prognostic value of COL3A1/FBN1/COL5A2/SPARC-mir-29a-3p-H19 associated ceRNA network in Gastric Cancer through bioinformatic exploration	out	irrlevant
The protective effects of S14G-humanin (HNG) against lipopolysaccharide (LPS)- induced inflammatory response in human dental pulp cells (hDPCs) mediated by the TLR4/MyD88/NF-κB pathway	out	irrlevant
The relevance of miRNAs as promising biomarkers in lip cancer.	out	irrlevant
The Role of Adipose Stem Cells in Bone Regeneration and Bone Tissue Engineering	out	irrlevant
The Role of Autophagy and Mitophagy in Bone Metabolic Disorders	out	irrlevant
The role of differentially expressed salivary microRNA in oral squamous cell carcinoma. A systematic review.	out	irrlevant
The Role of Exosomes Derived From Mesenchymal Stromal Cells in Dermatology	out	irrlevant
The Role of GH/IGF Axis in Dento-Alveolar Complex from Development to Aging and Therapeutics: A Narrative Review	out	irrlevant
The role of microRNA in periodontal tissue: A review of the literature.	out	irrlevant
The Role of microRNAs in Pulp Inflammation	out	review
The Role of MicroRNAs in the Osseointegration Process.	out	irrlevant
The role of miRNA-200a in the early stage of the mandibular development.	out	irrlevant
The Role of Oxidative Stress in Common Risk Factors and Mechanisms of Cardio-Cerebrovascular Ischemia and Depression	out	irrlevant
The role of prophylactic ibuprofen and N-acetylcysteine on the level of cytokines in periapical exudates and the post-treatment pain	out	irrlevant
The Role of the Microbiome in Oral Squamous Cell Carcinoma with Insight into the Microbiome–Treatment Axis	out	irrlevant
The Role of Wnt Signaling in Squamous Cell Carcinoma.	out	irrlevant
The roles of microRNAs in the stemness of oral cancer cells.	out	irrlevant
The search for novel analgesics: targets and mechanisms	out	irrlevant
The Significance of Relative Claudin Expression in Odontogenic Tumors	out	irrlevant
The systemic administration of an anti-miRNA oligonucleotide encapsulated pH-sensitive liposome results in reduced level of hepatic microRNA-122 in mice.	out	irrlevant
The Trinity of Matrix Metalloproteinases, Inflammation, and Cancer: A Literature Review of Recent Updates	out	irrlevant
The two stem cell microRNA gene clusters C19MC and miR-371-3 are activated by specific chromosomal rearrangements in a subgroup of thyroid adenomas.	out	irrlevant
The use of host defense peptides in root canal therapy in rats	out	irrlevant
The Utility of Pooling Salivary MicroRNA Sample for Oral Disease Related Research: Systematic Review.	out	irrlevant
Therapeutic Functions of Stem Cells from Oral Cavity: An Update	out	irrlevant
Therapeutic Potential of Dental Pulp Stem Cells According to Different Transplant Types	out	irrlevant
Therapeutic Potential of Synthetic Human <i>β</i>-Defensin 1 Short Motif Pep-B on Lipopolysaccharide-Stimulated Human Dental Pulp Stem Cells	out	irrlevant
Therapeutic potentials and modulatory mechanisms of fatty acids in bone	out	irrlevant
Time-Course Transcriptome Analysis of Gingiva-Derived Mesenchymal Stem Cells Reveals That Fusobacterium nucleatum Triggers Oncogene Expression in the Process of Cell Differentiation	out	irrlevant
Tissue Engineering in Stomatology: A Review of Potential Approaches for Oral Disease Treatments	out	irrlevant
TITANIUM ACTS ON OSTEOBLAST TRANSLATIONAL PROCESS.	out	irrlevant
TLR2 expression is regulated by microRNA miR-19 in rheumatoid fibroblast-like synoviocytes.	out	irrlevant
To die and yet live: Karbala in Urdu discursive landscapes	out	language
To extract or not to extract? Management of infraoccluded second primary molars without successors	out	irrlevant
Toll-Like Receptor Signaling and Immune Regulatory Lymphocytes in Periodontal Disease	out	irrlevant
Toll-Like Receptors and Dental Mesenchymal Stromal Cells	out	irrlevant
Tooth Clenching Until Exhaustion Evokes Exercise-Induced Hypoalgesia in Healthy Persons and in Patients with Temporomandibular Disorders.	out	irrlevant
Topical Epigallocatechin-3-gallate Hydrogels Regulated Inflammation and Pain	out	irrlevant
Transcription factor/microRNA axis blocks melanoma invasion program by miR-211 targeting NUAK1.	out	irrlevant
Transcriptional regulation by methyltransferases and their role in the heart: highlighting novel emerging functionality	out	irrlevant
Transcriptome sequencing wide functional analysis of human mesenchymal stem cells in response to TLR4 ligand	out	irrlevant
Transduction Properties of an Adenovirus Vector Containing Sequences Complementary to a Liver-Specific microRNA, miR-122a, in the 3'-Untranslated Region of the E4 Gene in Human Hepatocytes from Chimeric Mice with Humanized Liver.	out	irrlevant
Treatment of human airway epithelial Calu-3 cells with a peptide-nucleic acid (PNA) targeting the microRNA miR-101-3p is associated with increased expression of the cystic fibrosis Transmembrane Conductance Regulator () gene.	out	irrlevant
Treatment with Luteolin Improves Lipopolysaccharide-Induced Periodontal Diseases in Rats	out	irrlevant
Treg: A Promising Immunotherapeutic Target in Oral Diseases	out	irrlevant
Triclosan alters antimicrobial and inflammatory responses of epithelial cells.	out	irrlevant
Two miRNA clusters, Mir-17-92 (Mirc1) and Mir-106b-25 (Mirc3), are involved in the regulation of spermatogonial differentiation in mice.	out	irrlevant
Types of Lasers and Their Applications in Pediatric Dentistry	out	irrlevant
Über Die Dimensionsstabilität Von Wurzelkanalfüllmaterialien Auf Guttaperchabasis	out	language
Über Die Entfernung Von Kalziumhydroxid Aus Dem Wurzelkanal (Einfluss Des Spülvolumens)	out	language
University of Eastern Finland	out	irrlevant
University of Helsinki	out	irrlevant
Unraveling the Role of the Apical Papilla During Dental Root Maturation	out	irrlevant
Update of the list of QPS‐recommended biological agents intentionally added to food or feed as notified to EFSA 10: Suitability of taxonomic units notified to EFSA until March 2019	out	irrlevant
Upregulation of a potential prognostic biomarker, miR-155, enhances cell proliferation in patients with oral squamous cell carcinoma.	out	irrlevant
Upregulation of Gingival Tissue miR-200b in Obese Periodontitis Subjects.	out	irrlevant
Upregulation of matrix metalloproteinase-1 production by prostaglandin F2α in human gingival fibroblasts.	out	irrlevant
Upregulation of microRNA miR-141-3p and its prospective targets in endometrial carcinoma: a comprehensive study.	out	irrlevant
Urine microRNA as potential biomarkers of autosomal dominant polycystic kidney disease progression: description of miRNA profiles at baseline.	out	irrlevant
Urine microRNA Profiling Displays miR-125a Dysregulation in Children with Fragile X Syndrome.	out	irrlevant
Use of Cone-Beam Computed Tomography in the Diagnosis and Treatment of an Unusual Canine Abnormality	out	irrlevant
Using Mesenchymal Stem Cells to Treat Female Infertility: An Update on Female Reproductive Diseases	out	irrlevant
Validation of microRNA expression profile in Oral Lichenoid Disease through cytological samples.	out	irrlevant
Validation of miR-1228-3p as Housekeeping for MicroRNA Analysis in Liquid Biopsies from Colorectal Cancer Patients.	out	irrlevant
Various levels of circulating exosomal total-miRNA and miR-210 hypoxamiR in different forms of pregnancy hypertension.	out	irrlevant
Verbesserungsmöglichkeiten Des adhäsiven Trepanationsverschlusses Und Prüfung herkömmlicher Verschlussarten	out	irrlevant
Versatile Use of Chitosan and Hyaluronan in Medicine	out	irrlevant
Viral MicroRNAs Identified in Human Dental Pulp	out	irrlevant
Viral MicroRNAs Modulate Transcriptome in Oral Keratinocytes and Alter Cytokine Levels in Myeloid Cells	out	irrlevant
Viral miRNAs Alter Host Cell miRNA Profiles and Modulate Innate Immune Responses	out	irrlevant
VISTA Blockade Aggravates Bone Loss in Experimental Murine Apical Periodontitis	out	irrlevant
VX765 Attenuates Pyroptosis and HMGB1/TLR4/NF-κB Pathways to Improve Functional Outcomes in TBI Mice	out	irrlevant
What’s new in the management of metastatic bone disease	out	irrlevant
Widespread microRNA dysregulation in multiple system atrophy - disease-related alteration in miR-96.	out	irrlevant
WNT gene polymorphisms and predisposition to apical periodontitis	out	irrlevant
WNT-5A: signaling and functions in health and disease	out	irrlevant
Women, health, and poverty in Gwadar, Balochistan, Pakistan	out	irrlevant
World Congress on Osteoporosis, Osteoarthritis and Musculoskeletal Diseases (WCO-IOF-ESCEO 2018): Poster Abstracts	out	irrlevant
World Workshop on Oral Medicine VII: Functional pathways involving differentially expressed lncRNAs in oral squamous cell carcinoma.	out	irrlevant
Yes‐associated protein promotes tumour necrosis factor α–treated cementoblast mineralization partly by inactivating NF‐κB pathway	out	irrlevant
Yunnan Baiyao Conditioned Medium Promotes the Odonto/Osteogenic Capacity of Stem Cells from Apical Papilla via Nuclear Factor Kappa B Signaling Pathway	out	irrlevant
Zoologischer Garten Berlin AG (Germany) – Annual Report, 2016	out	irrlevant
Zyklische Ermüdung Einer Lithium-Disilikat-Glaskeramik Im Vier-Punkt-Biegeversuch	out	language
人牙源性多能干细胞重编程前后微小RNAs 差异表达谱系分析.	out	language
口腔白斑病癌变相关缺氧应答基因和微小RNA的 芯片检测及表达验证.	out	language
微小RNAs在牙釉质发育过程中的表达和作用	out	language
微小RNA对成骨调控作用的研究进展.	out	language
环状RNA在口腔鳞状细胞癌中的作用探讨.	out	language
长链非编码RNA PCGEM1通过转化生长因子 β2/Smad2信号通路调控口腔鱗状细胞癌 侵袭和转移的机制研究	out	language
非编码RNA在人牙周膜来源细胞成骨分化中的作用.	out	language

## Sheet: FULL TEXT SCRENNING RESULTS 
Differential expression of microRNAs in normal and inflamed human pulps
Clinical Value and Potential Target of miR-27a-3p in Pulpitis.
Comprehensive analysis of an lncRNA-miRNA-mRNA competing endogenous RNA network in pulpitis
Comprehensive analysis of differentially expressed genes in clinically diagnosed irreversible pulpitis by multiplatform data integration using a robust rank aggregation approach.
Decreased expression of microRNA030b promotes the development of pulpitis by upregulating the expression of interleukin06 receptor
Expression profiles of inflammation-associated microRNAs in periapical lesions and human periodontal ligament fibroblasts inflammation
Expression profiling and functional characterization of MicroRNAs in apical periodontitis.
Inflammation0induced overexpression ofmicroRNA022303p regulates odontoblastic differentiation of human dental pulp stem cells by targeting SMAD3
Metalloproteinase 14 (MMP-14) and hsa-miR-410-3p expression in human inflamed dental pulp and odontoblasts
MicroRNA-335-5p plays dual roles in periapical lesions by complex regulation pathways.
microRNA0146a and Hey2 form a mutual negative feedback loop to regulate the inflammatory response in chronic apical periodontitis.
new insights into the pathogenesis of endodontic periapical disease
